# Supplementary material for: Influence of pseudohalide anions on non-covalent supramolecular synthons in Hg( ii ) complexes with an 8-aminoquinoline ligand: DFT approach and biological implications
Source: Royal Society of Chemistry journal article supplement (doi:10.1039/d5ra09546h), 2026-01-01
Supplement: d5ra09546h1.pdf [file d5ra09546h1.pdf]

**Influence of Pseudohalide Anions on Non-Covalent Supramolecular Synthons in Hg(II) complexes with 8-aminoquinoline ligand: DFT Approach and Biological Implications.**

Dhrubajyoti Majumdar <sup>a\*</sup>, Antonio Frontera <sup>b</sup>, Jessica Elizabeth Philip <sup>c</sup>, Bouzid Gassoumi <sup>d</sup>, Sergi Burguera <sup>b</sup>, Sourav Roy <sup>e</sup>, Sahbi Ayachi <sup>f</sup>

<sup>a</sup> Department of Chemistry, Tamralipta Mahavidyalaya, Tamluk-721636, West Bengal, India.

<sup>b</sup> Department de Química, Universitat de les Illes Balears, Crta. de Valldemossa km 7.5. 07122 Palma de Mallorca (Balears), Spain.

<sup>c</sup> Department of Chemistry, St. George's College, Aruvithura, Kottayam, Kerala-686122, India.

<sup>d</sup> Laboratory of Advanced Materials and Interfaces (LIMA), Faculty of Sciences of Monastir, Avenue of Environment, University of Monastir, 5000 Monastir, Tunisia.

<sup>e</sup> Solid State and Structural Chemistry Unit, Indian Institute of Science, Bangalore 560 012, India.

<sup>f</sup> Laboratory of Physico-Chemistry of Materials (LR01ES19), Faculty of Sciences, University of Monastir, Avenue of the Environment 5019 Monastir, Tunisia.

**Corresponding author EMAIL:** dmajumdar30@gmail.com, toni.frontera@uib.es.

## **Contents of Electronic Supporting Materials**

|                                                                                                                 |                       |
|-----------------------------------------------------------------------------------------------------------------|-----------------------|
| 1. Experimental of Disk diffusion method.                                                                       | <b>SCHEME S1.</b>     |
| 2. Resazurin Microdilution Assay (RMDA).                                                                        | <b>SECTION S2.</b>    |
| 3. Cytotoxicity MTT Assay.                                                                                      | <b>SECTION S3.</b>    |
| 4. Principle of Hirshfeld Surface.                                                                              | <b>SECTION S4.</b>    |
| 5. Principle of NLO analysis.                                                                                   | <b>SECTION S5.</b>    |
| 6. Importance of Quinoline (Q) moiety in 8-aq.                                                                  | <b>SCHEME S1.</b>     |
| 7. Crystal data and structure refinement parameters.                                                            | <b>TABLE S1.</b>      |
| 8. Selected distances (Å) and angles (°) experimental vs. computed at the DFT/B3LYP-D3/LanL2DZ level of theory. | <b>TABLE S2.</b>      |
| 9. Hydrogen bond distances (Å) and angles (°) of complexes <b>1 &amp; 2.</b>                                    | <b>TABLE S3.</b>      |
| 10. EDX data.                                                                                                   | <b>TABLE S4.</b>      |
| 11. (b) XYZ coordinates the complex <b>1-2.</b>                                                                 | <b>TABLE S5-S6.</b>   |
| 12. HRMS for the complex <b>1 &amp; 2.</b>                                                                      | <b>FIGURE S1-S2.</b>  |
| 13. IR spectrum for 8-aq, NaSCN, and KSeCN.                                                                     | <b>FIGURE S3a-c.</b>  |
| 14. IR spectrum for complex <b>1 and 2.</b>                                                                     | <b>FIGURE S4a-b.</b>  |
| 15. (a) Raman spectrum for complex <b>1 and 2.</b>                                                              | <b>FIGURE S5a-b.</b>  |
| (b) Theoretical Raman and FT-IR spectra of the studied Hg(II) complex.                                          | <b>FIGURE S5C.</b>    |
| 16. (a) UV-VIS spectrum (High-Low Conc.) for the complex <b>1.</b>                                              | <b>FIGURE S6a-a1.</b> |
| (b) UV-VIS spectrum (High-Low Conc.) for the complex <b>2.</b>                                                  | <b>FIGURE S6b-b1.</b> |
| 17. <sup>1</sup> H NMR spectra for complex <b>1 and 2.</b>                                                      | <b>FIGURE S7a-b.</b>  |
| 18. <sup>13</sup> C NMR spectra for complex <b>1 and 2.</b>                                                     | <b>FIGURE S8a-b.</b>  |
| 19. <sup>13</sup> C DEBT NMR spectra for complex <b>1 and 2.</b>                                                | <b>FIGURE S9a-b.</b>  |
| 20. EDX profile for complex <b>1.</b>                                                                           | <b>FIGURE S10.</b>    |

21. SEM micrographs for complex 1. **FIGURE S11a-j.**
22. XPS graphical representation for complex 1. **FIGURE S12a-e.**
23. (a) Hirshfeld surface and 2D Fingerprints for complex 1 & 2. **FIGURE S13-14.**
- (b) Histogram showing the different percentage of HS contacts. **FIGURE S14a.**
24. DFT optimized structures of the Hg(II) complexes. **FIGURE S15.**

### **Section S1: Experimental of Disk diffusion method.**

The disc diffusion method was used to assess the antimicrobial activity of the Hg (II) complexes. Cephalothin, chloramphenicol, and cycloheximide were positive controls for Gram-positive and Gram-negative bacteria and fungi. Nutrient agar was prepared, autoclaved at 121°C for 15 minutes, cooled, and poured into Petri dishes. The compounds were dissolved in dimethyl sulfoxide (DMSO) to prepare 100 and 50 mg/mL concentrations. A 10 µL volume of each preparation was applied to 6 mm diameter disks, resulting in final concentrations of 1 and 0.5 mg/disk, respectively. Bacterial cultures were grown in nutrient broth at 30°C. After 16 hours, each microorganism, at a concentration of 10<sup>8</sup> cells/mL, was inoculated onto the surface of Mueller–Hinton agar plates using a sterile cotton swab. Filter paper disks (6 mm in diameter) were then impregnated with 10 µL of each dissolved compound and placed on the inoculated plates. The plates were incubated at 36°C for 24 hours. Three replicates were performed for each extract and test organism, including a solvent-only negative control. After incubation, the inhibition zones around each disk were measured in millimetres using a transparent ruler, averaged, and recorded.

### **Section S2: Resazurin Microdilution Assay.**

The antimicrobial activity of Hg compounds was assessed using the Resazurin Microdilution Assay (RMDA). [The assay was performed in 96-well microtiter plates (HiMedia) under controlled conditions. In the first row, 100 µL of the test compounds dissolved in sterile water was added, while all wells were filled with 50 µL of Luria broth. A two-fold serial dilution was then performed by transferring 50 µL from the first row to subsequent rows, creating a range of concentrations. Each well was supplemented with 2 µL of resazurin solution as a growth indicator and 10 µL of microbial suspension, resulting in a final concentration of 5×10<sup>6</sup> CFU/mL. Three controls were included on each plate: (a) Cephalothin as a positive control, (b) wells with all reagents except the test compound, and (c) wells where microbial suspension

was replaced by 10  $\mu$ L of Luria broth. The plates were incubated at 37°C for 24 hours, and colour changes were monitored. A shift from purple to pink or colourless signalled microbial growth, and the MIC was determined as the lowest concentration with no colour change.

### **Section S3: Cytotoxicity MTT Assay.**

H9c2 and HepG2 cells were cultured in Dulbecco's Modified Eagle's Medium (DME) and [seeded into 96-well plates at a density of  $5 \times 10^3$  cells per well. The plates were incubated at 37°C with 5% CO<sub>2</sub> for 24 hours before adding test samples. The cells were then treated with different concentrations (1, 5, 10, and 25  $\mu$ M) of the compounds dissolved in DMSO and incubated at 37°C with 5% CO<sub>2</sub> for 24 hours. Each experiment was performed in triplicate. After the 24-hour treatment, MTT solution was added to the wells (following media removal) at a concentration of 50  $\mu$ g per well, and the plates were incubated in a CO<sub>2</sub> incubator. The MTT solution was prepared in Hank's balanced salt solution (HBSS) without phenol red. After 3 hours, the resulting formazan crystals were observed under a contrast microscope. The crystals were then dissolved by adding DMSO (after removing the MTT solution), followed by a 20-minute incubation at 37°C. The absorbance was measured at 570 nm to assess cell viability.

### **Section S4: Principle of Hirshfeld Surface.**

To gain a comprehensive understanding of the intra- and intermolecular interactions that contribute to the stability of complex, Hirshfeld surface analysis is employed. [S1,S2] This technique is particularly effective for visualizing interactions using color coding. Interactions characterized by distances greater than, equal to, and less than sum of van der Waals radii are indicated by red, white, and blue color regions on the HS respectively. The predominant forces responsible for the stability of both studied complexes have been analyzed with 2D-fingerprint plots. This tool quantifies the contribution of each intermolecular contact as a percentage of the total HS area.

### **Section S5: Principle of NLO analysis.**

The NLO properties of the studied compounds, **1** and **2**, were analyzed and compared to those of urea, a widely used reference molecule in NLO research. [S3,S4] The calculated NLO parameters are presented in Table 4, and some parameters are computed using the following equations:

$$\mu_{tot} = \sqrt{(\mu_x^2 + \mu_y^2 + \mu_z^2)} \quad (1)$$

$$\alpha_{ISO} = \frac{1}{3}(\alpha_{xx} + \alpha_{yy} + \alpha_{zz}) \quad (2)$$

$$\alpha_{ANISO} = \frac{1}{\sqrt{2}}[(\alpha_{xx} - \alpha_{yy})^2 + (\alpha_{xx} - \alpha_{zz})^2 + (\alpha_{zz} - \alpha_{yy})^2 + 6(\alpha_{yz}^2 + \alpha_{xz}^2 + \alpha_{xy}^2)]^{1/2} \quad (3)$$

$$\beta_0 = [(\beta_{xxx} + \beta_{xyy} + \beta_{xzz})^2 + (\beta_{xxy} + \beta_{yyy} + \beta_{yzz})^2 + (\beta_{xxz} + \beta_{zyy} + \beta_{zzz})^2]^{1/2} \quad (4)$$

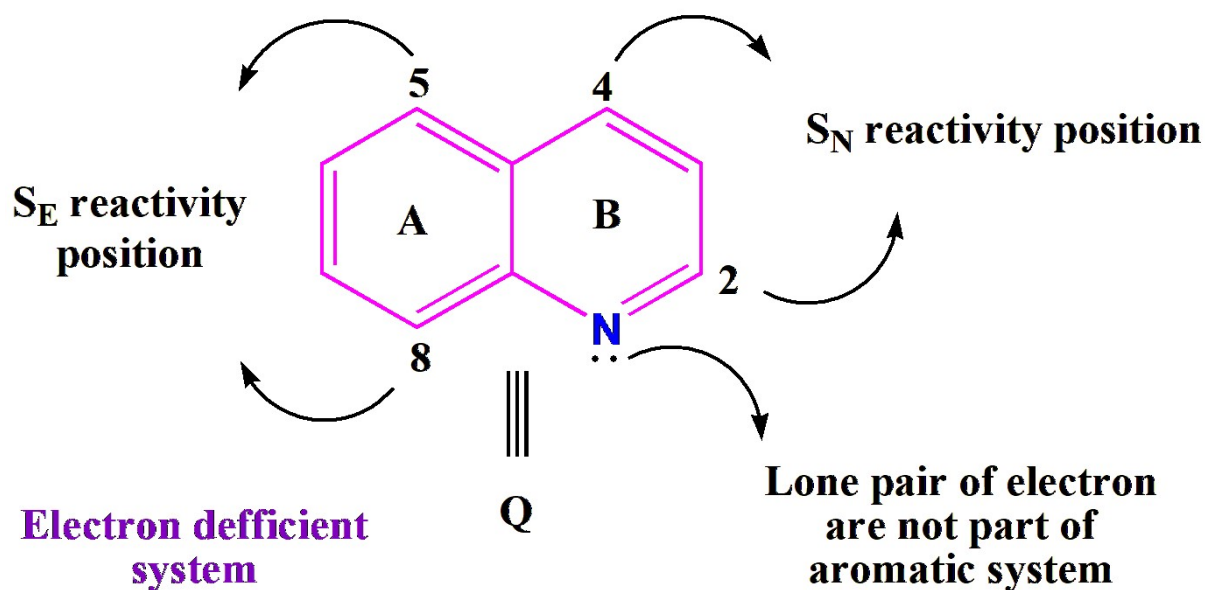

### Complexing Activities of Q (Quinoline) Moiety.

#### Q Salient features

1. Ring N takes part for metal complex formation
2. Supramolecular  $\pi$ - $\pi$  stacking interactions
3. Metal complexes planar and stable
4. Ring N assisted extra coordination site for complex formation

SCHEME S1 Importance of Quinoline (Q) moiety in 8-aq. [S5]

**Table S1** Complexes crystal data and structure refinement parameters.

| Identification code                         | 1                                                             | 2                                                             |
|---------------------------------------------|---------------------------------------------------------------|---------------------------------------------------------------|
| Empirical formula                           | C <sub>10</sub> H <sub>8</sub> ClHgN <sub>3</sub> S           | C <sub>10</sub> H <sub>8</sub> ClHgN <sub>3</sub> Se          |
| Formula weight                              | 438.29                                                        | 485.19                                                        |
| Temperature/K                               | 296.15                                                        | 298(2)                                                        |
| Crystal system                              | monoclinic                                                    | monoclinic                                                    |
| Space group                                 | <i>P2<sub>1</sub>/c</i>                                       | <i>P2<sub>1</sub>/c</i>                                       |
| a/Å                                         | 10.5813(19)                                                   | 10.780(17)                                                    |
| b/Å                                         | 14.597(3)                                                     | 14.69(2)                                                      |
| c/Å                                         | 7.8316(14)                                                    | 7.948(12)                                                     |
| α/°                                         | 90                                                            | 90                                                            |
| β/°                                         | 105.946(4)                                                    | 106.55(4)                                                     |
| γ/°                                         | 90                                                            | 90                                                            |
| Volume/Å <sup>3</sup>                       | 1163.1(4)                                                     | 1206(3)                                                       |
| Z                                           | 4                                                             | 4                                                             |
| ρ <sub>calc</sub> /cm <sup>3</sup>          | 2.503                                                         | 2.672                                                         |
| μ/mm <sup>-1</sup>                          | 13.615                                                        | 15.972                                                        |
| F(000)                                      | 808.0                                                         | 880.0                                                         |
| Crystal size/mm <sup>3</sup>                | 0.1 × 0.08 × 0.05                                             | 0.3 × 0.24 × 0.02                                             |
| Radiation                                   | MoKα (λ = 0.71073)                                            | MoKα (λ = 0.71073)                                            |
| 2θ range for data collection/°              | 4.004 to 50.378                                               | 3.942 to 50.702                                               |
| Index ranges                                | -12 ≤ h ≤ 12, -17 ≤ k ≤ 17, -9 ≤ l ≤ 9                        | -12 ≤ h ≤ 12, -17 ≤ k ≤ 17, -9 ≤ l ≤ 9                        |
| Reflections collected                       | 34880                                                         | 37667                                                         |
| Independent reflections                     | 2076 [R <sub>int</sub> = 0.2062, R <sub>sigma</sub> = 0.0666] | 2174 [R <sub>int</sub> = 0.1609, R <sub>sigma</sub> = 0.0664] |
| Data/restraints/parameters                  | 2076/0/145                                                    | 2174/0/146                                                    |
| Goodness-of-fit on F <sup>2</sup>           | 0.932                                                         | 1.022                                                         |
| Final R indexes [I ≥ 2σ (I)]                | R <sub>1</sub> = 0.0418, wR <sub>2</sub> = 0.1066             | R <sub>1</sub> = 0.0440, wR <sub>2</sub> = 0.1034             |
| Final R indexes [all data]                  | R <sub>1</sub> = 0.0603, wR <sub>2</sub> = 0.1127             | R <sub>1</sub> = 0.0744, wR <sub>2</sub> = 0.1214             |
| Largest diff. peak/hole / e Å <sup>-3</sup> | 1.69/-2.13                                                    | 1.48/-1.65                                                    |

**Table S2** Selected distances (Å) and angles (°) experimental vs. computed at the DFT/B3LYP-D3/LanL2DZ level of theory.

| Complex 1   |              |       |
|-------------|--------------|-------|
| Bond length | Experimental | DFT   |
| Hg1-S1      | 2.507 (3)    | 2.628 |
| Hg1-Cl1     | 2.560 (4)    | 2.531 |

|                    |             |         |
|--------------------|-------------|---------|
| Hg1-N2             | 2.322 (9)   | 2.504   |
| Hg1-N1             | 2.346 (9)   | 2.602   |
| <b>Bond Angles</b> |             |         |
| Se1-Hg1-Cl1        | 114.43 (10) | 149.729 |
| N2-Hg1-Cl1         | 101.92 (19) | 109.495 |
| N2-Hg1-S1          | 131.48 (19) | 118.370 |
| N2-Hg1-N1          | 73.7 (3)    | 66.463  |
| N1-Hg1-Cl1         | 95.8 (2)    | 84.624  |
| N1-Hg1-S1          | 129.5 (2)   | 118.370 |

| <b>Complex 2</b>   |                     |            |
|--------------------|---------------------|------------|
| <b>Bond length</b> | <b>Experimental</b> | <b>DFT</b> |
| Hg1-Se1            | 2.394 (3)           | 2.750      |
| Hg1-Cl1            | 2.539 (2)           | 2.513      |
| Hg1-N2             | 2.297 (7)           | 2.517      |
| Hg1-N1             | 2.346 (7)           | 2.588      |
| <b>Bond Angles</b> |                     |            |
| Se1-Hg1-Cl1        | 114.60 (12)         | 144.727    |
| N2-Hg1-Cl1         | 102.0 (2)           | 107.059    |
| N2-Hg1-Se1         | 131.7 (2)           | 102.796    |
| N2-Hg1-N1          | 73.3 (3)            | 66.295     |
| N1-Hg1-Cl1         | 95.3 (3)            | 107.283    |
| N1-Hg1-Se1         | 129.5 (2)           | 102.796    |

**Table S3** Hydrogen bond distances (Å) and angles (°) of complexes **1** & **2**.

| D-H...A                         | D-H  | H...A | D...A     | ∠D-H...A |
|---------------------------------|------|-------|-----------|----------|
| <b>Complex 1</b>                |      |       |           |          |
| N(1)-H(1A)···N(3) <sup>a</sup>  | 0.89 | 2.35  | 3.049(13) | 136      |
| N(1)-H(1B)···Cl(1) <sup>b</sup> | 0.89 | 2.45  | 3.334(7)  | 172      |
| C(8)-H(8)···Cl(1) <sup>c</sup>  | 0.93 | 2.67  | 3.537(10) | 155      |
| <b>Complex 2</b>                |      |       |           |          |
| N(1)-H(1A)···N(3) <sup>a</sup>  | 0.89 | 2.40  | 3.126(16) | 138      |
| N(1)-H(1B)···Cl(1) <sup>b</sup> | 0.89 | 2.47  | 3.351(11) | 170      |
| C(8)-H(8)···Cl(1) <sup>c</sup>  | 0.93 | 2.70  | 3.567(13) | 156      |

D = donor; H = hydrogen; A = acceptor. <sup>a</sup>= x, y, 1+z, <sup>b</sup>= x, 1/2-y, 1/2+z, <sup>c</sup>= x, 1/2-y, 1/2+z.

**Table S4** EDX data.

| <b>Spectrum 1</b> |           |                        |         |        |            |            |                |                  |
|-------------------|-----------|------------------------|---------|--------|------------|------------|----------------|------------------|
| Element           | Line Type | Apparent Concentration | K Ratio | Wt %   | Wt % Sigma | Atomic C % | Standard Label | Factory Standard |
| C                 | K series  | 0.04                   | 0.00038 | 45.02  | 1.17       | 74.17      | C Vit          | Yes              |
| N                 | K series  | 0.03                   | 0.00006 | 11.64  | 1.35       | 16.44      | BN             | Yes              |
| S                 | K series  | 0.04                   | 0.00033 | 9.86   | 0.47       | 6.08       | FeS2           | Yes              |
| Hg                | M series  | 0.10                   | 0.00094 | 33.49  | 1.15       | 3.30       | HgTe           | Yes              |
| Total             |           |                        |         | 100.00 |            | 100.00     |                |                  |



**Table S5** XYZ coordinate of the complex 1.

| Number | Symbol | X          | Y          | Z          |
|--------|--------|------------|------------|------------|
| 1      | Hg     | 1.4376810  | 0.0407330  | -0.0355280 |
| 2      | Cl     | 2.9145660  | -1.7698250 | 0.9379510  |
| 3      | S      | 1.1892310  | 2.3441910  | -1.2777650 |
| 4      | N      | -0.7936860 | 0.0009850  | 1.1020960  |
| 5      | N      | -0.0763570 | -1.9386370 | -0.7859710 |
| 6      | H      | 0.1580490  | -2.3899580 | -1.6667410 |
| 7      | H      | 0.3316950  | -2.4333720 | 0.0111160  |
| 8      | C      | -1.7964850 | -0.5825170 | 0.3491350  |
| 9      | C      | -1.1152160 | 0.8924610  | 2.0482600  |
| 10     | H      | -0.2917710 | 1.3442440  | 2.5937450  |
| 11     | C      | -3.1695650 | -0.1985870 | 0.5164780  |
| 12     | C      | -1.4509710 | -1.5514070 | -0.6525110 |
| 13     | C      | -2.4565180 | 1.2727860  | 2.3232640  |
| 14     | H      | -2.6557270 | 1.9985370  | 3.1042060  |
| 15     | C      | -3.4748540 | 0.7424530  | 1.5442650  |
| 16     | H      | -4.5064280 | 1.0517340  | 1.6921810  |
| 17     | C      | -2.4442080 | -2.0465810 | -1.4926930 |
| 18     | H      | -2.1855590 | -2.7734080 | -2.2596810 |
| 19     | C      | -4.1640790 | -0.7392480 | -0.3516470 |
| 20     | H      | -5.1998370 | -0.4337170 | -0.2282060 |
| 21     | N      | -1.7280990 | 2.4521030  | -0.9983240 |
| 22     | C      | -3.7992880 | -1.6294870 | -1.3513340 |
| 23     | H      | -4.5485580 | -2.0319950 | -2.0272070 |
| 24     | C      | -0.5462560 | 2.4048110  | -1.1169990 |

**Table S6** XYZ coordinate of the complex 2.

| Number | Symbol | X          | Y          | Z          |
|--------|--------|------------|------------|------------|
| 1      | Se     | -2.9200050 | -1.1595760 | 0.1627270  |
| 2      | Cl     | -0.3525170 | 3.1478880  | 0.3100050  |
| 3      | N      | 1.0647230  | -0.6008280 | 0.8642140  |
| 4      | N      | 0.6027730  | -0.2065080 | -1.8613890 |
| 5      | C      | 2.1602660  | -0.4812730 | 0.0296130  |
| 6      | C      | 1.9499650  | -0.2034280 | -1.3630940 |
| 7      | C      | 3.4990510  | -0.5973070 | 0.5376510  |
| 8      | C      | 3.6540690  | -0.9500540 | 1.9138230  |
| 9      | C      | 3.0491340  | 0.0596480  | -2.1750910 |
| 10     | C      | 2.5340100  | -1.1362220 | 2.7135950  |
| 11     | C      | 4.6036230  | -0.3452910 | -0.3301490 |
| 12     | C      | 1.2438190  | -0.9203810 | 2.1503170  |
| 13     | C      | 4.3745700  | 0.0052910  | -1.6539470 |

|    |   |            |            |            |
|----|---|------------|------------|------------|
| 14 | C | -1.7917380 | -2.2663600 | -0.8382730 |
| 15 | N | -1.0227180 | -2.8980380 | -1.4924880 |
| 16 | H | 0.1701930  | -1.1390470 | -1.8602920 |
| 17 | H | 0.4927210  | 0.2585470  | -2.7601010 |
| 18 | H | 4.6547910  | -1.0621510 | 2.3241400  |
| 19 | H | 2.8978210  | 0.2829540  | -3.2286170 |
| 20 | H | 2.6210930  | -1.4097110 | 3.7597170  |
| 21 | H | 5.6158000  | -0.4257630 | 0.0580410  |
| 22 | H | 0.3507940  | -0.9915400 | 2.7644820  |
| 23 | H | 5.2097890  | 0.2142510  | -2.3165110 |

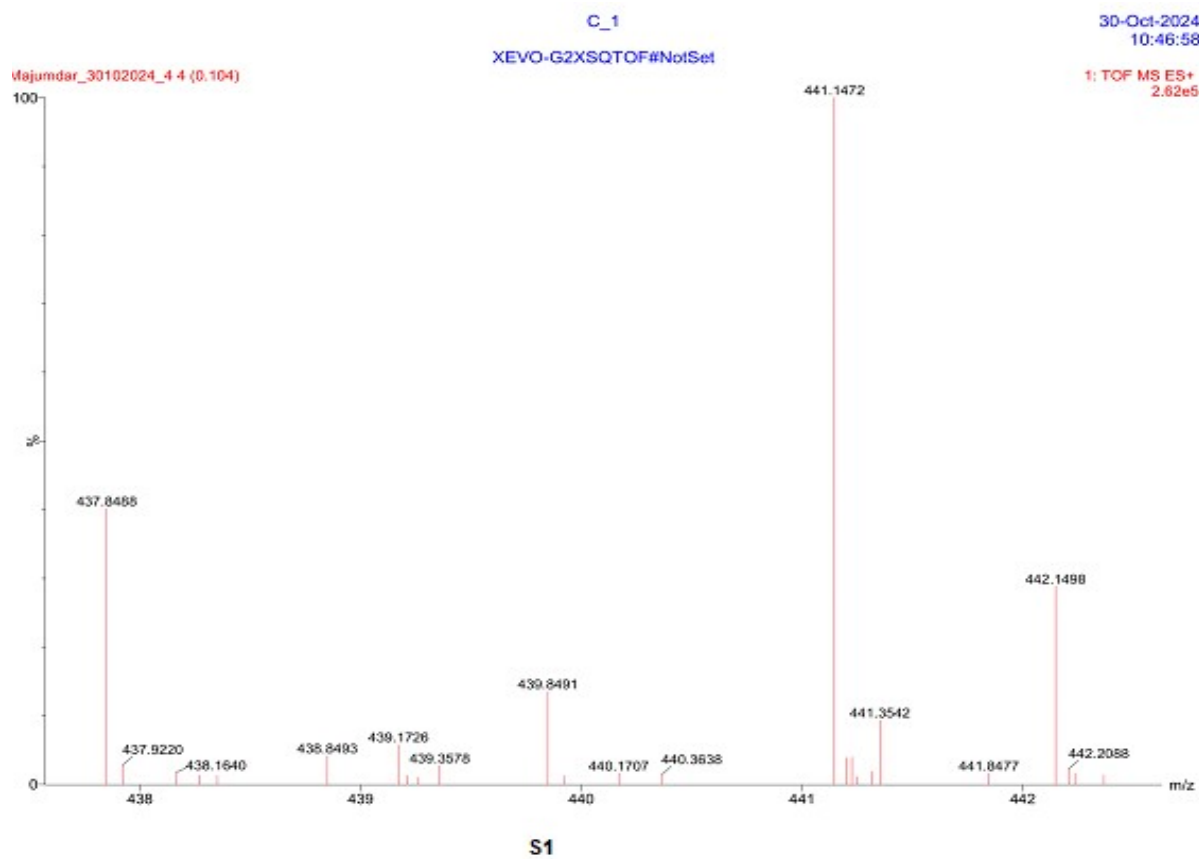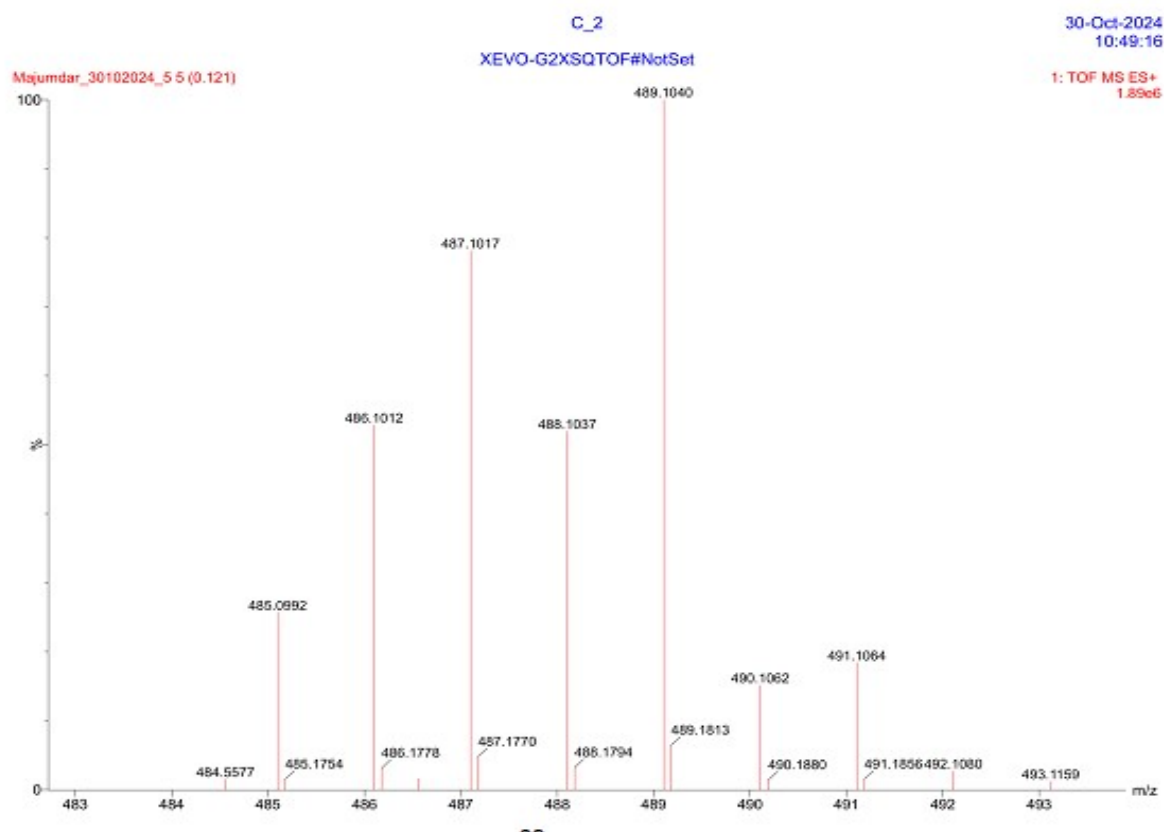

Fig.S1-S2 HRMS for the complex 1 & 2.

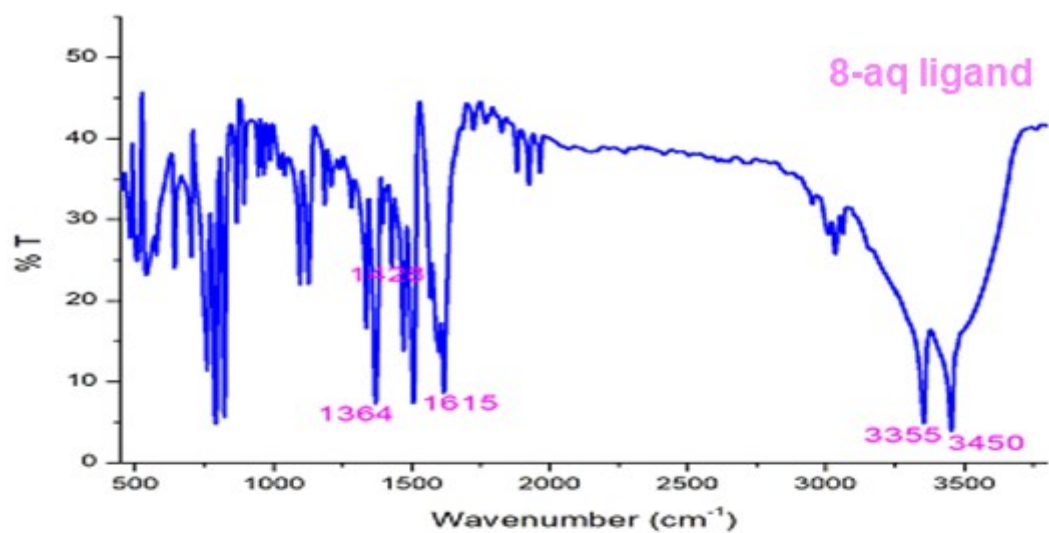

a

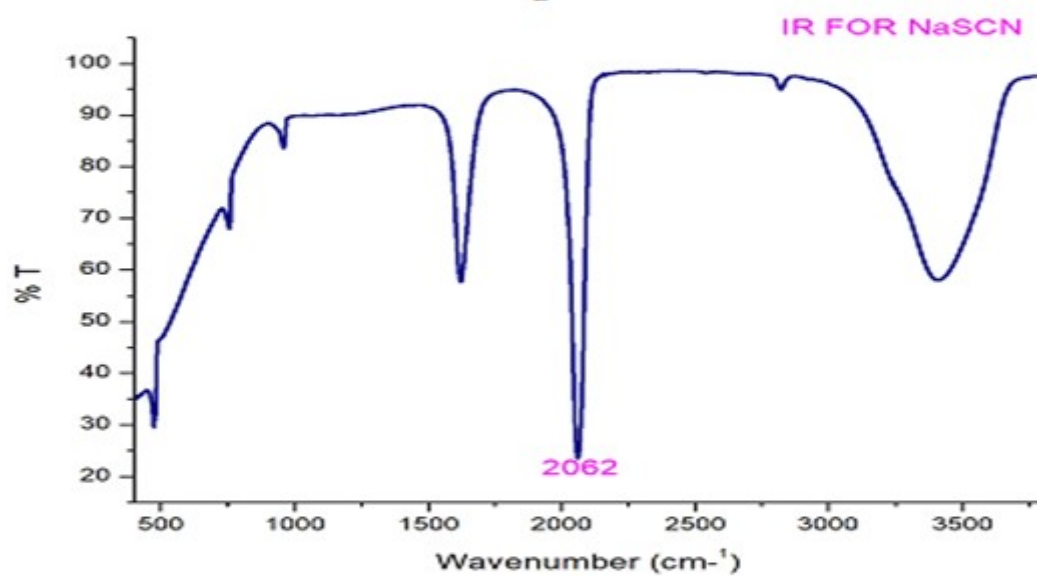

b

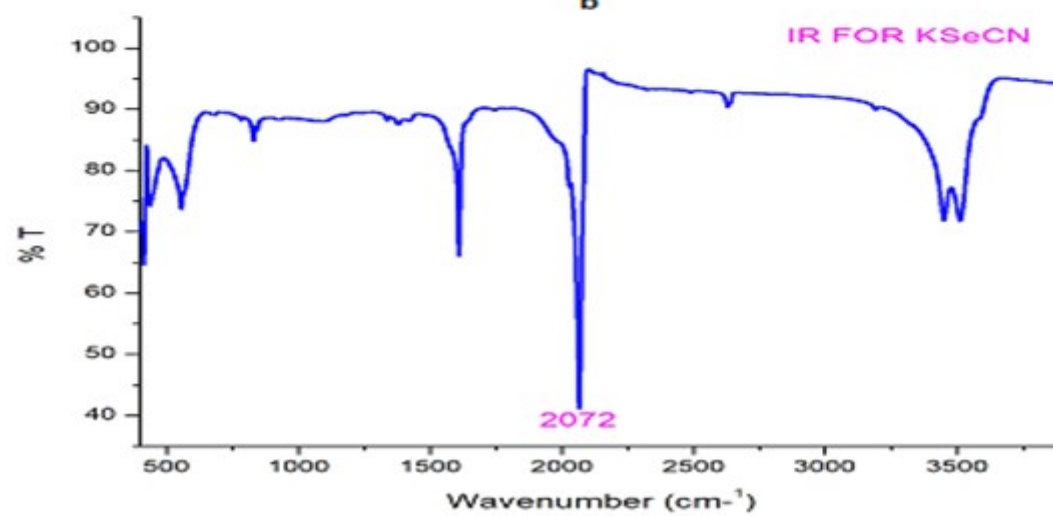

c

Fig.S3a-c IR spectrum for 8-aq, NaSCN, and KSeCN.

Additional From Fig.S3a-c, the IR spectral data for 8-aq, SCN<sup>-</sup> and SeCN<sup>-</sup> are listed below:

**1. For 8-aq**, IR spectral data:  $\nu(\text{N-H})$ , 3355-3500,  $\nu(\text{C}\equiv\text{C})$ , 1615,  $\nu(\text{phenyl ring})$ , 1428, 1364, (Fig.S3a).

**2. For SCN**, IR spectral data:  $\nu(\text{NaSCN})$ , 2062 (Fig.S3b).

**2. For SeCN**, IR spectral data:  $\nu(\text{SeCN})$ , 2127 s, (Fig.S3c).

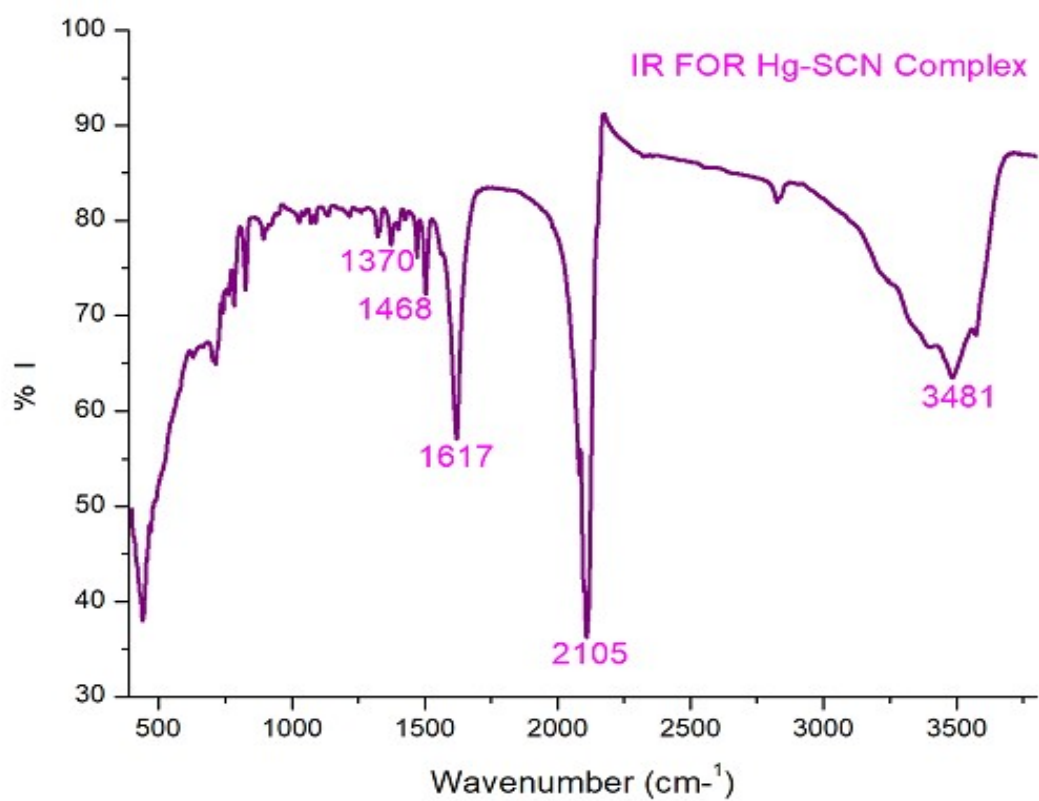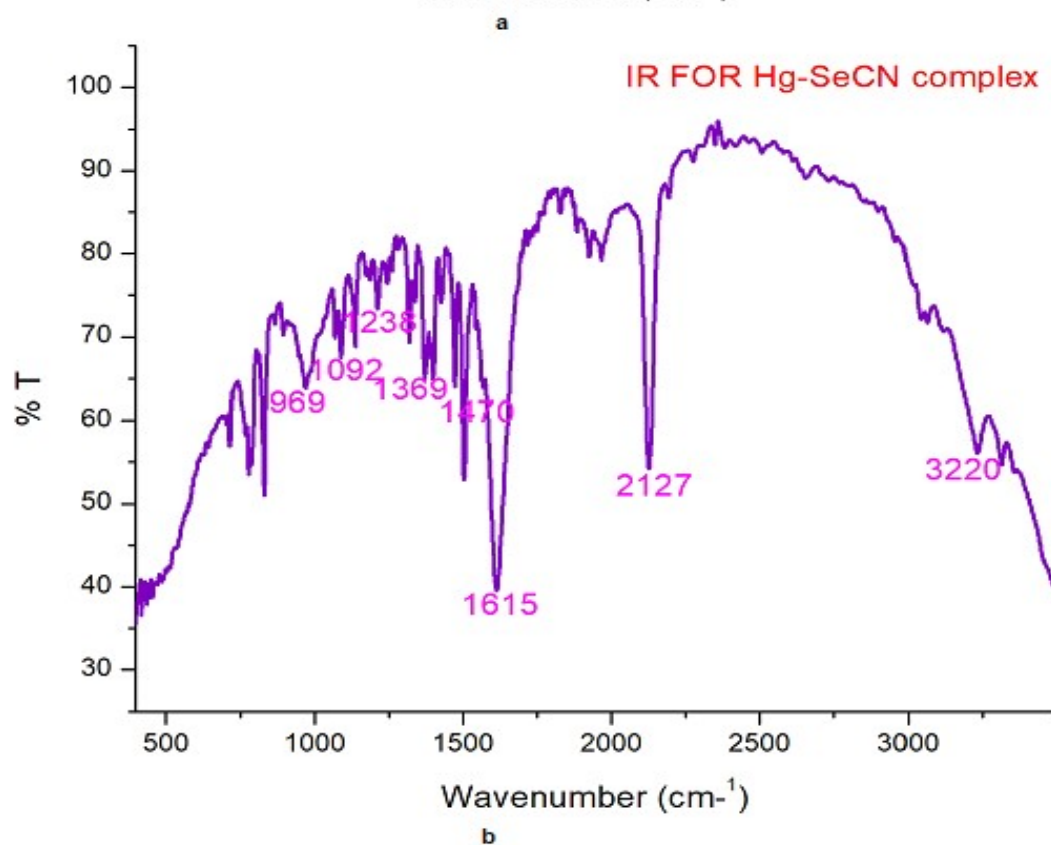

**Fig.S4a-b** IR spectrum for the complex 1 and 2.

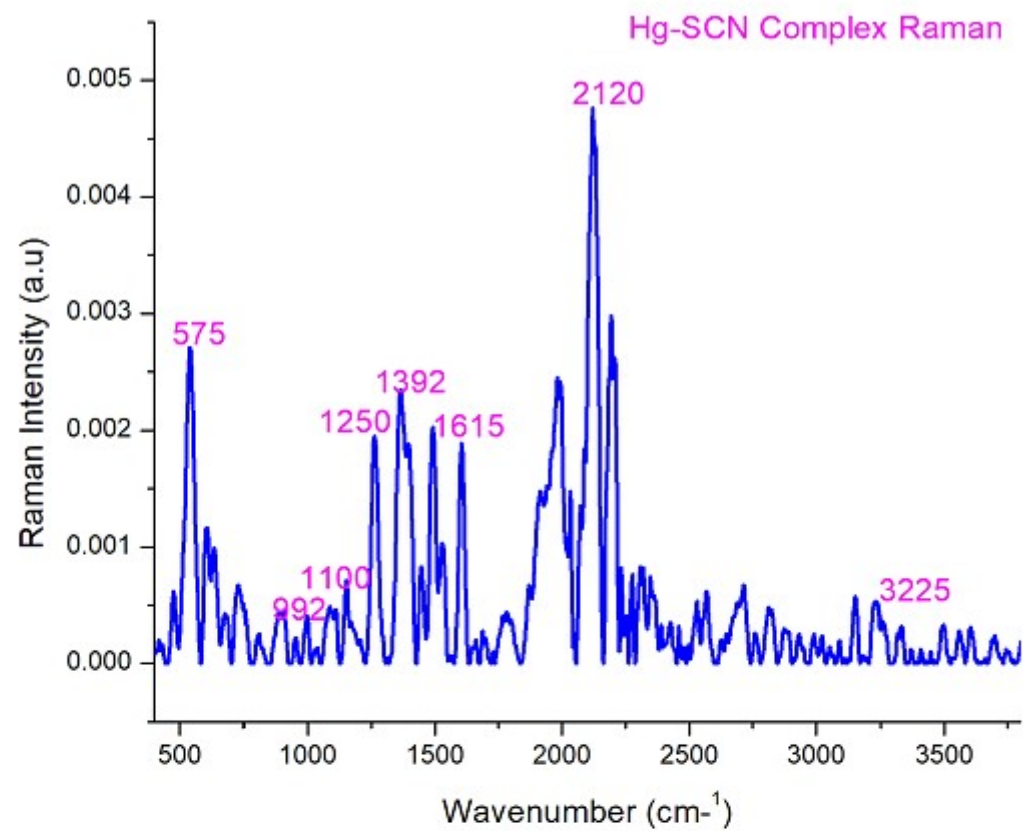

a

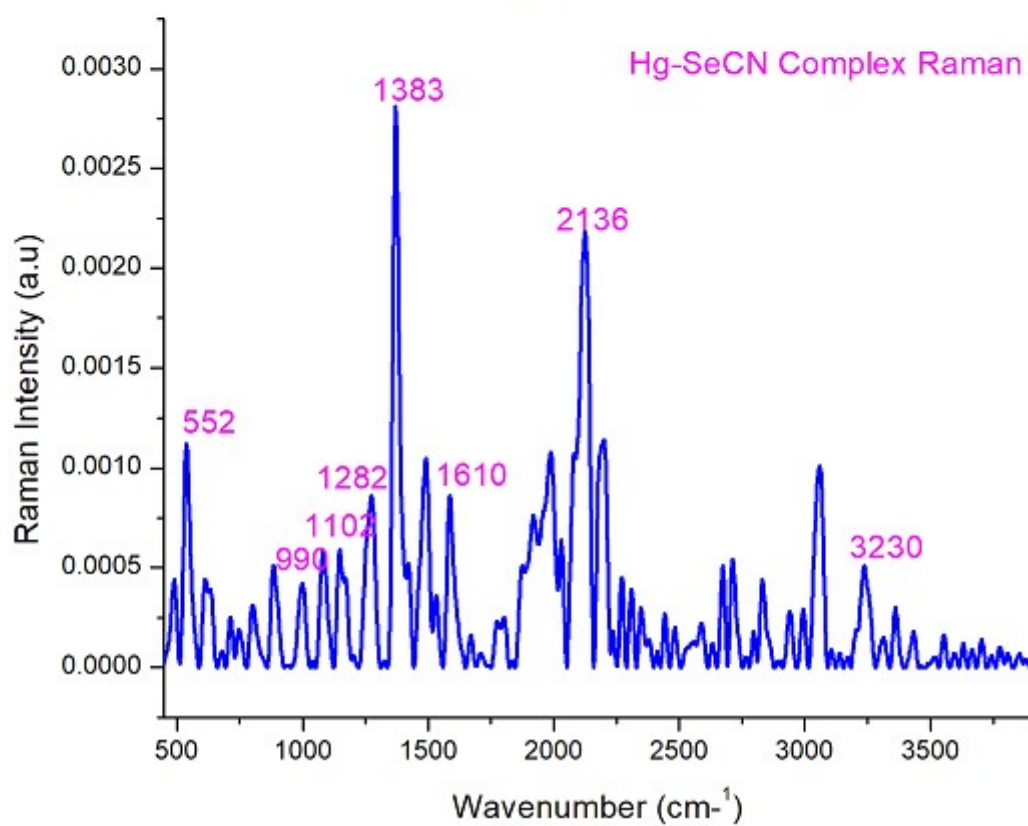

b

Fig.S5a-b Raman spectrum for the complex 1 and 2.

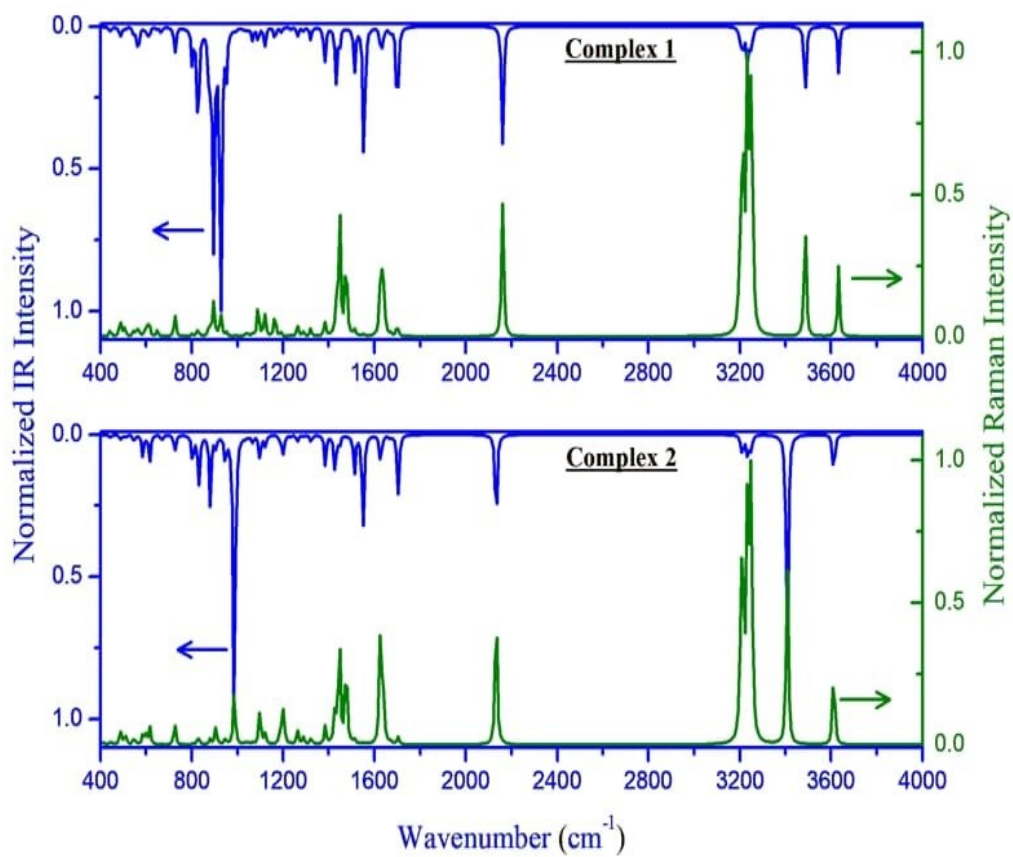

**Fig.S5c.** Theoretical Raman and FT-IR spectra of the studied Hg(II) complex.



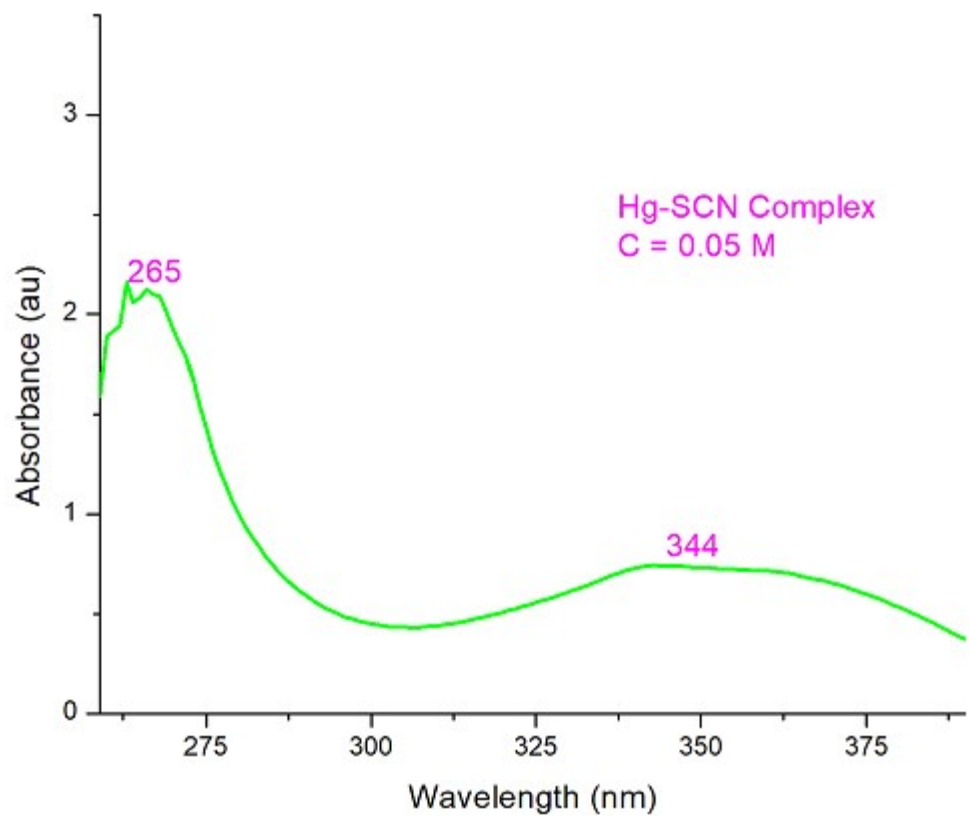**a**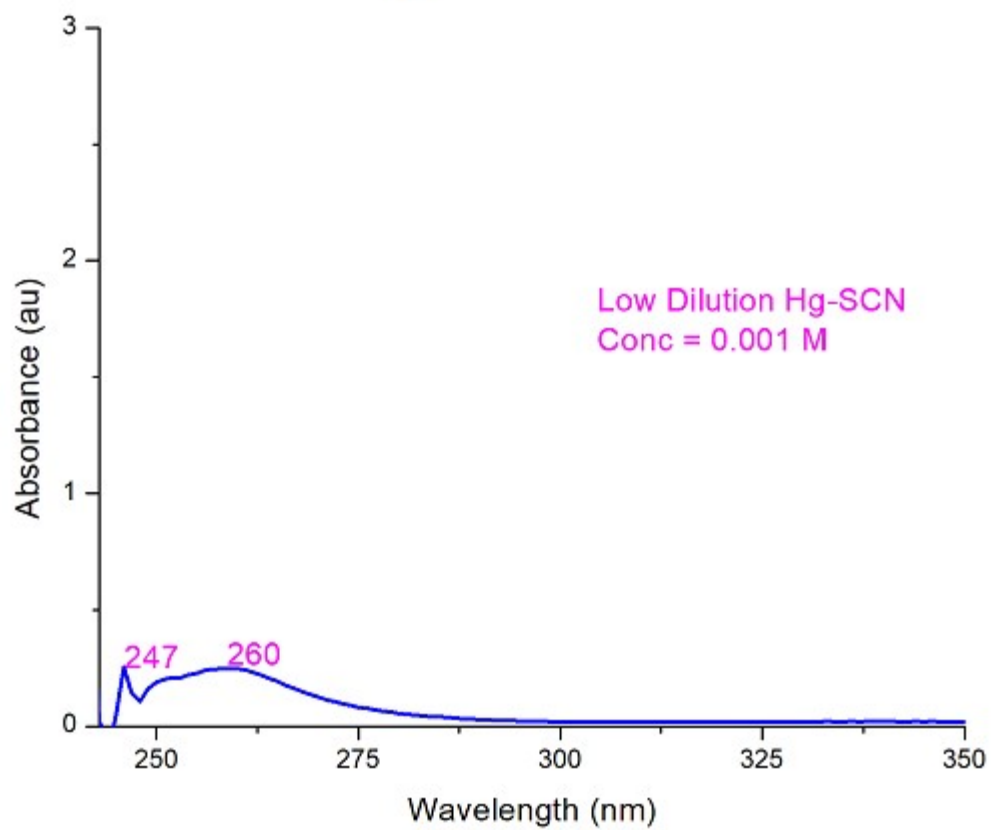**a1**

**Fig.S6a-a1.** UV-VIS spectrum (High-Low Conc.) for the complex **1**.

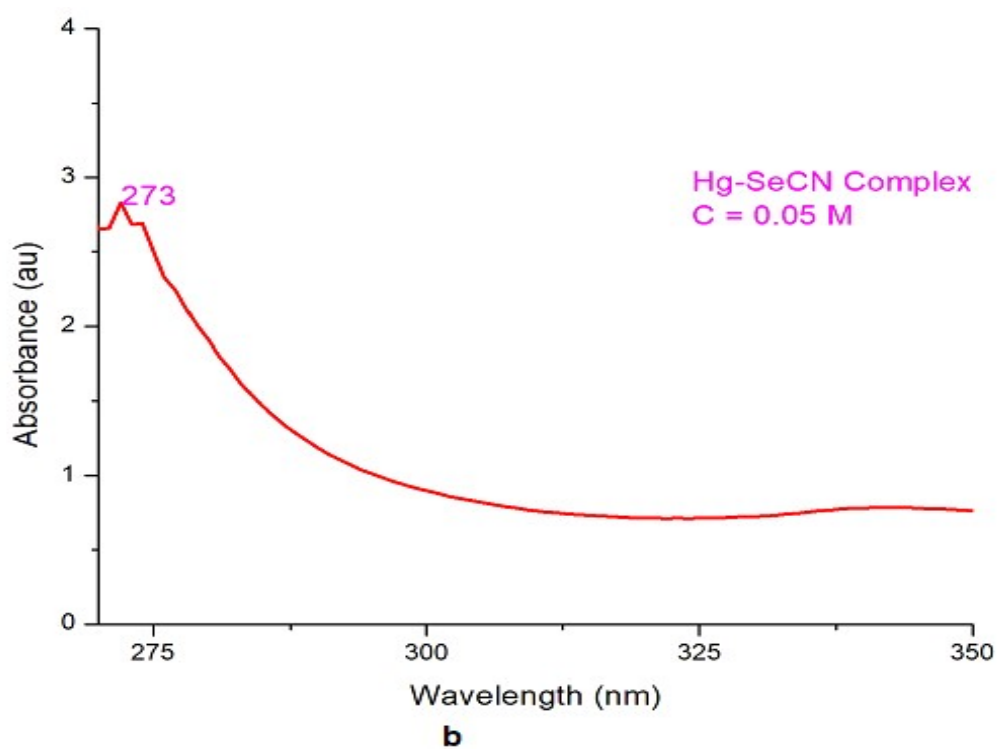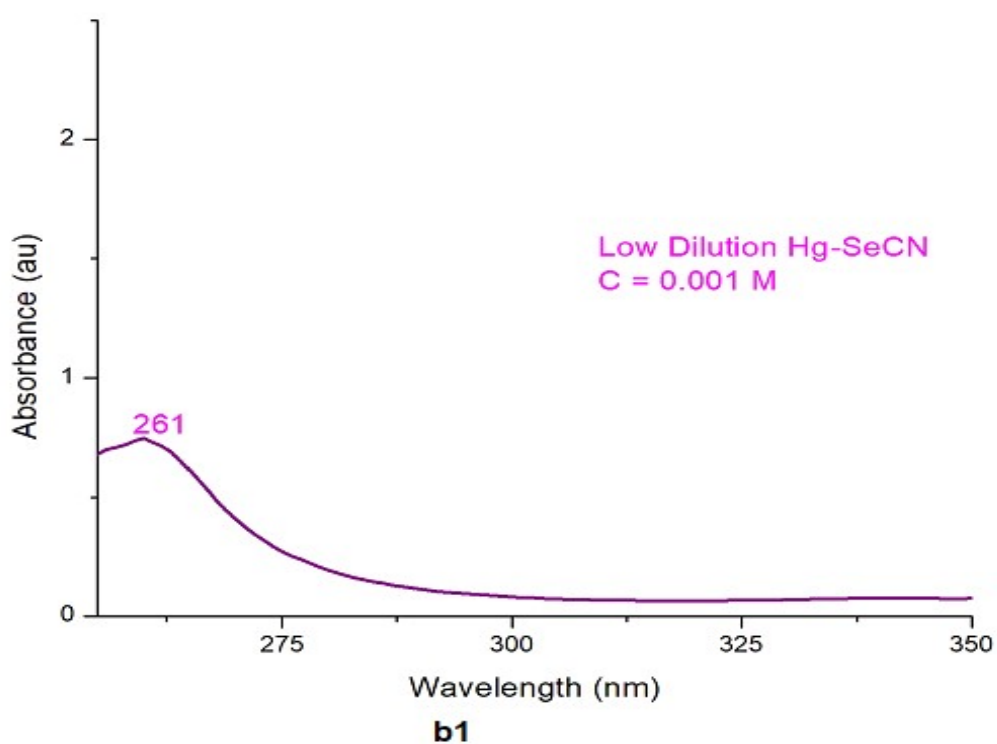

**Fig.S6b-b1.** UV-VIS spectrum (High-Low Conc.) for the complex **2**.

**Additional low dilution (0.001M) UV-VIS spectrum**

For Hg-SCN complex,  $\lambda_{\max}$  247 nm ( $\epsilon = 299 \text{ M}^{-1} \text{ cm}^{-1}$ ) and  $\lambda_{\max}$  260 nm ( $\epsilon = 258 \text{ M}^{-1} \text{ cm}^{-1}$ ).

For Hg-SeCN complex,  $\lambda_{\max}$  261 nm ( $\epsilon = 766 \text{ M}^{-1} \text{ cm}^{-1}$ ).

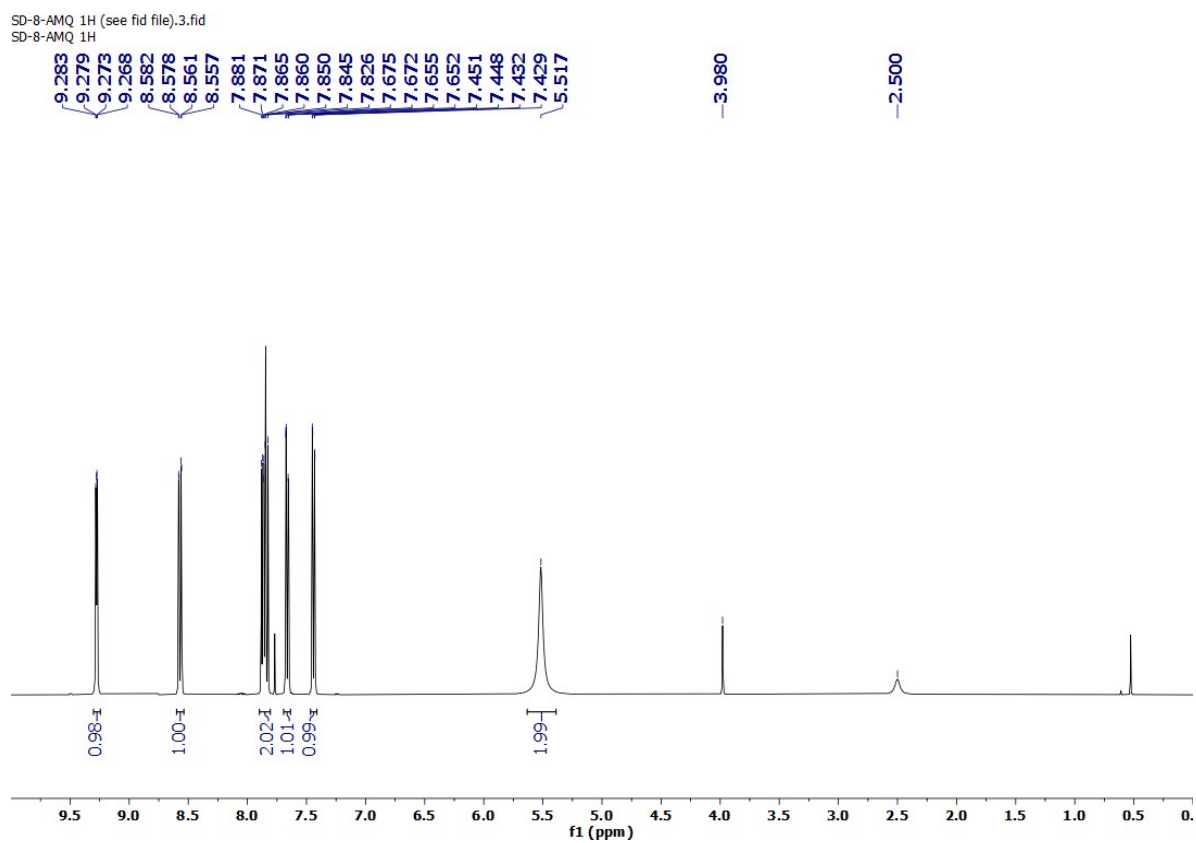

$^1\text{H}$  NMR (400 MHz,  $d_6$ -DMSO, ppm):  $\delta$  9.27 (1H, dd,  $J = 4.4, 2$  Hz), 8.56 (1H, dd,  $J = 8.4, 1.6$  Hz), 7.85 (2H, m), 7.66 (1H, dd,  $J = 8, 1.2$  Hz), 7.44 (1H, dd,  $J = 7.6, 1.2$  Hz), 5.51 (2H, br, s).

**Fig.S7a**  $^1\text{H}$  NMR spectra for 8-aq.

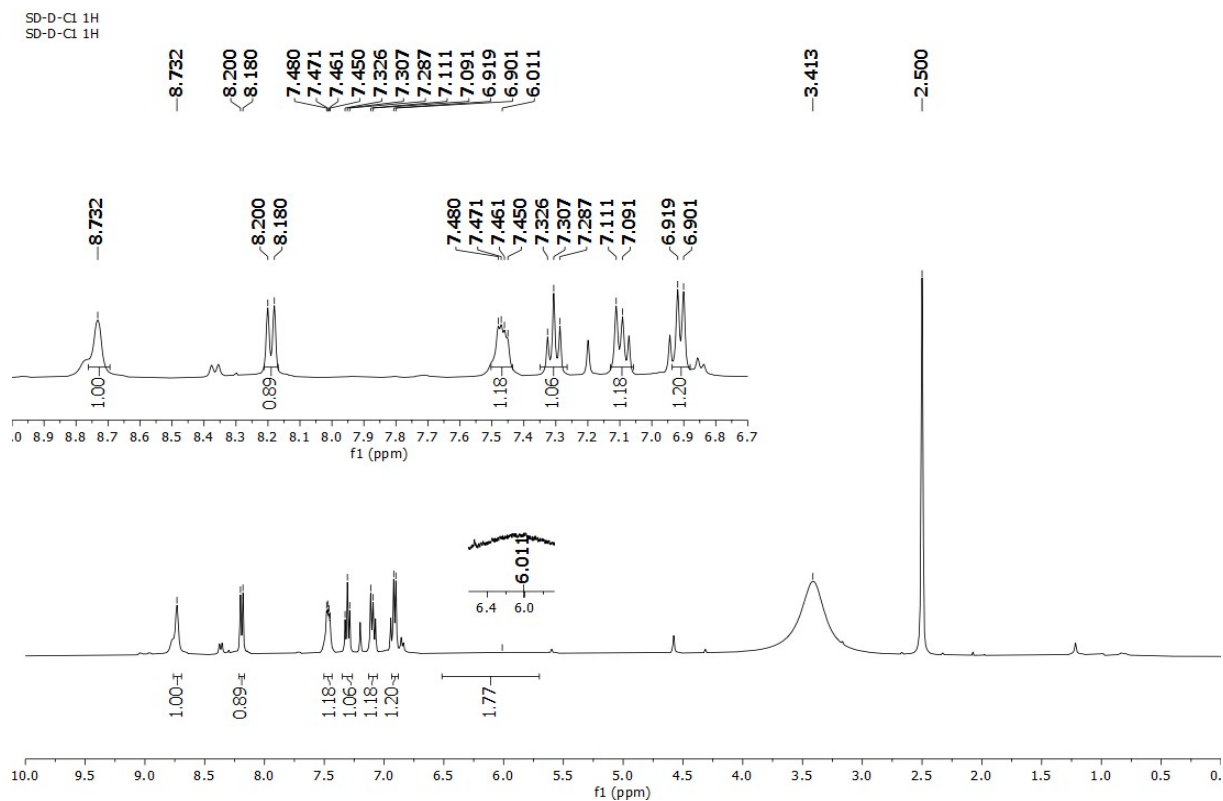

**Fig.S7b**  $^1\text{H}$  NMR spectra for complex 1.

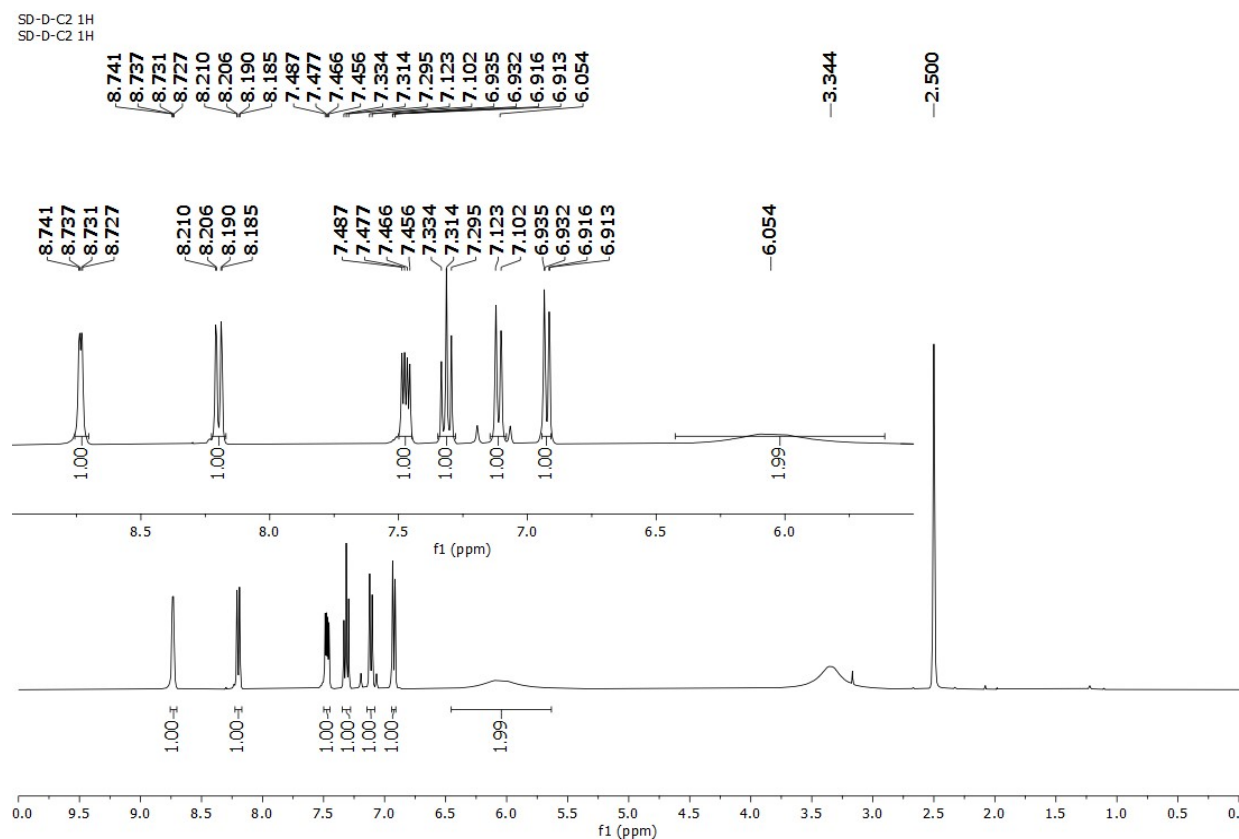

**Fig.S7c**  $^1\text{H}$  NMR spectra for complex 2.

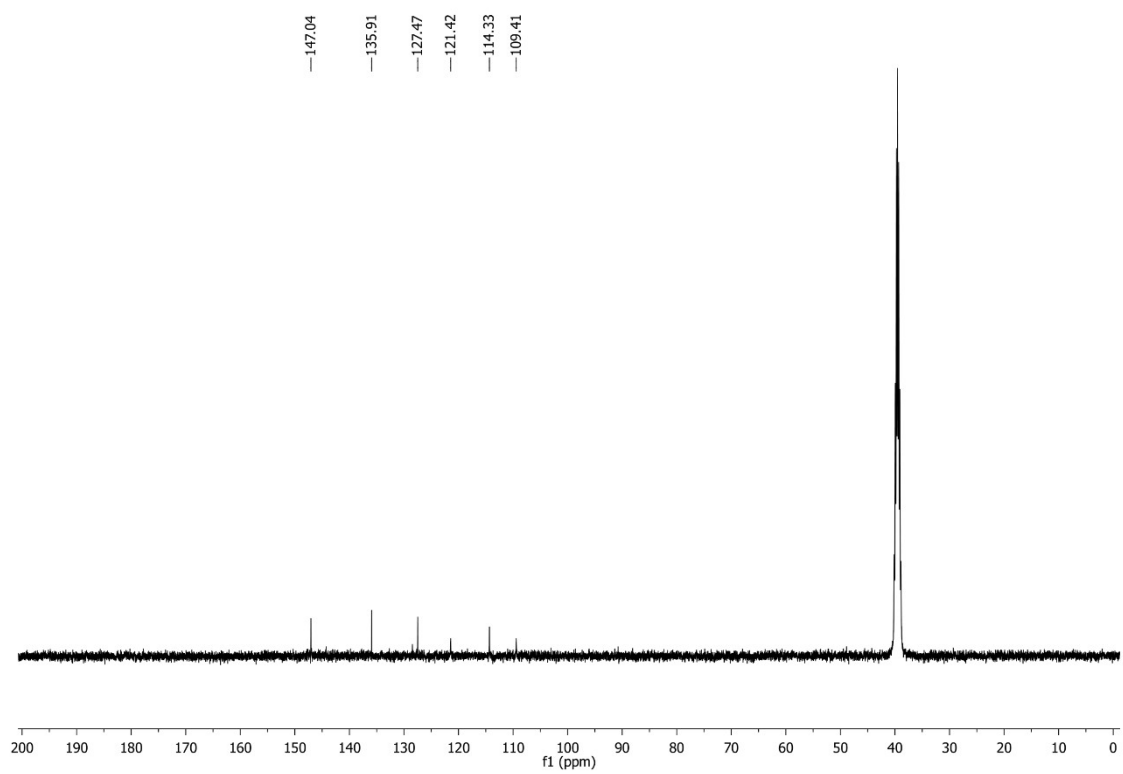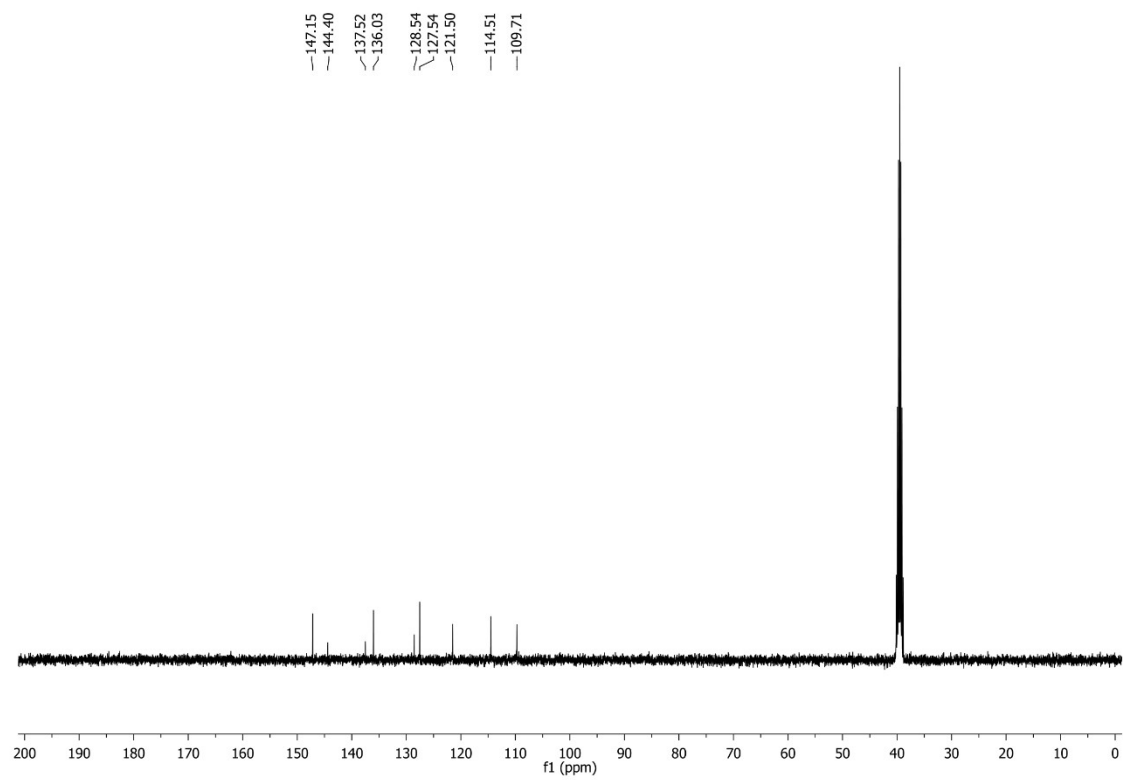

**Fig.S8a-b**  $^{13}\text{C}$  NMR spectra for complex 1 and 2.

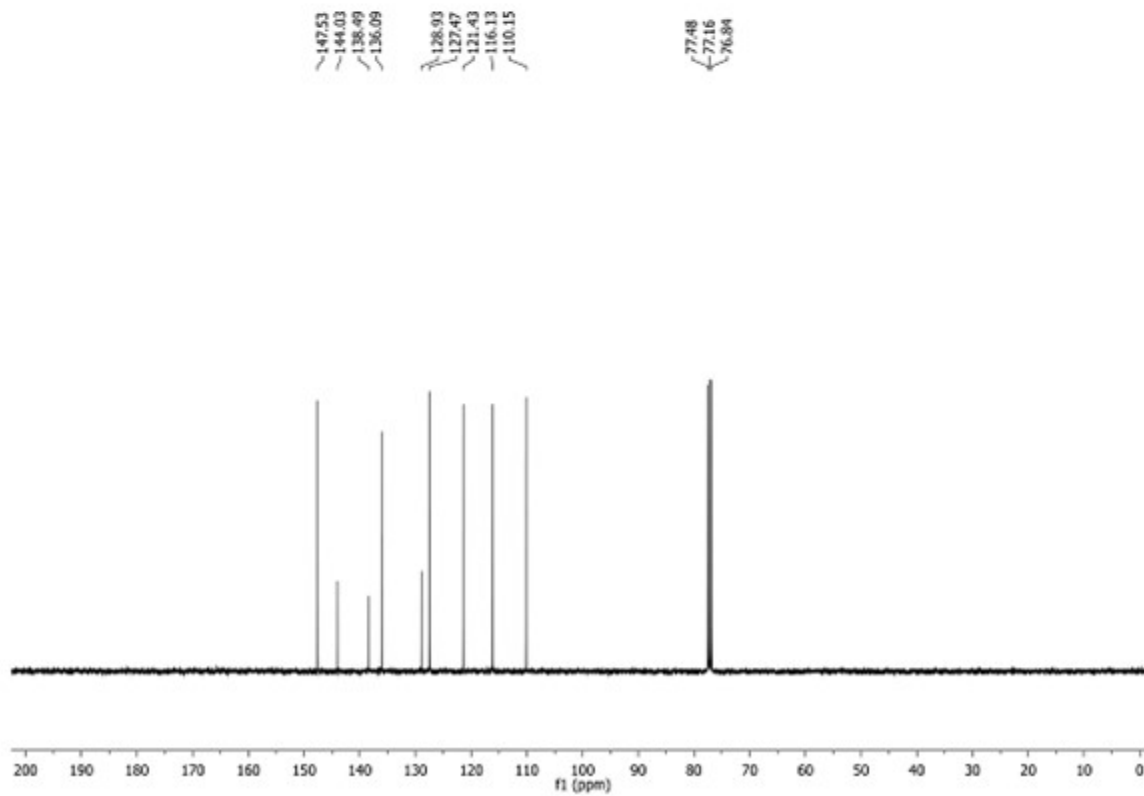

**Fig.S8b1.**  $^{13}\text{C}$  NMR spectra for 8-aq ligand.

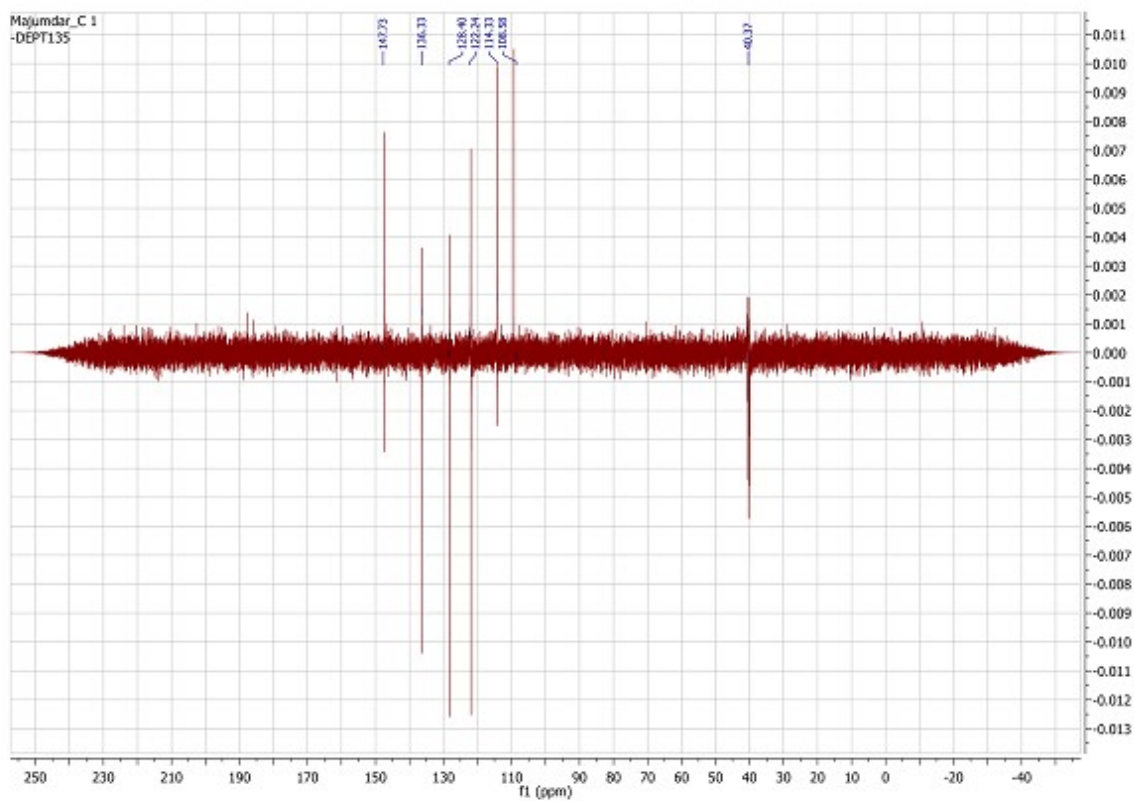**a**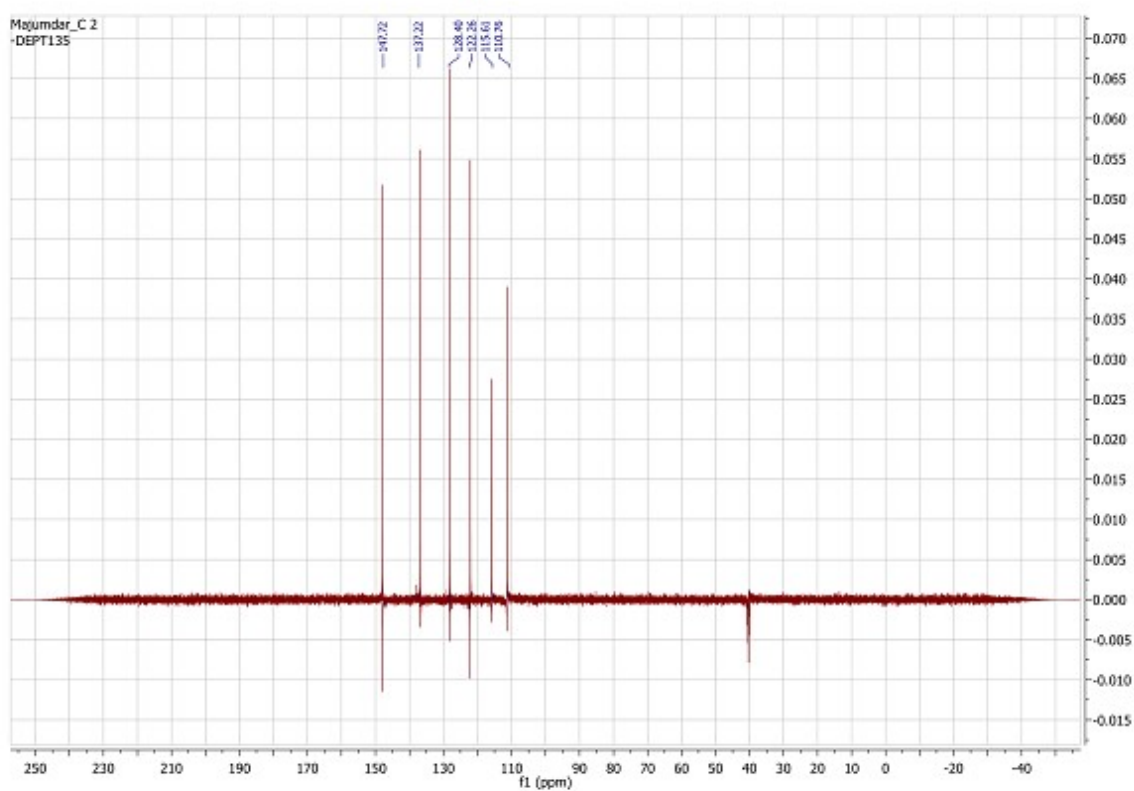**b**

**Fig.S9a-b**  $^{13}\text{C}$  DEPT NMR spectra for complex **1** and **2**.

12/03/2024

Electron Image 1

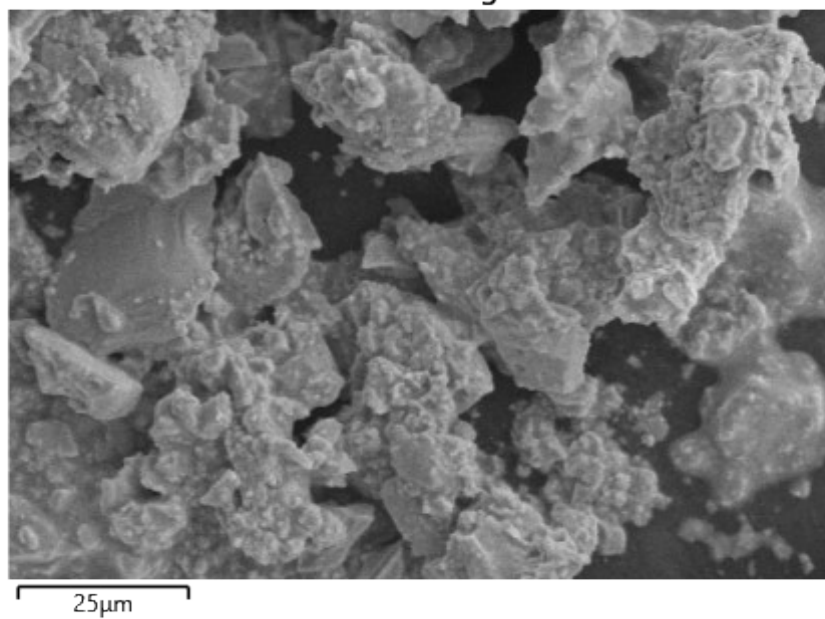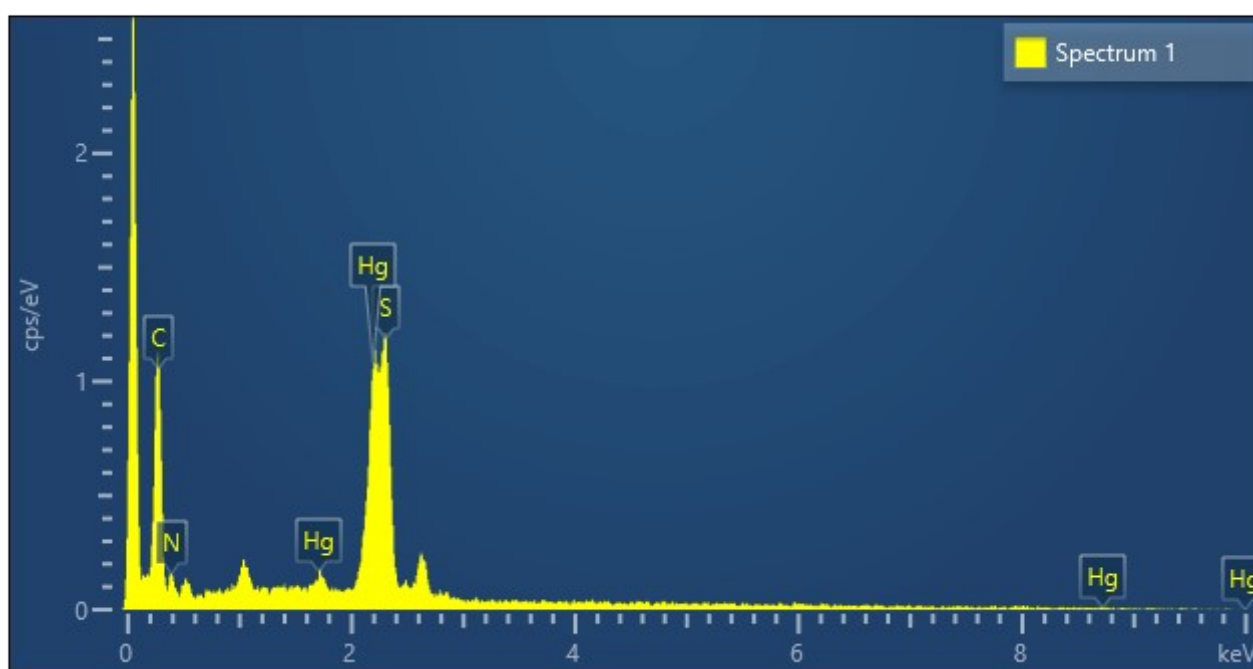**Fig.S10** EDX profile for complex 1.



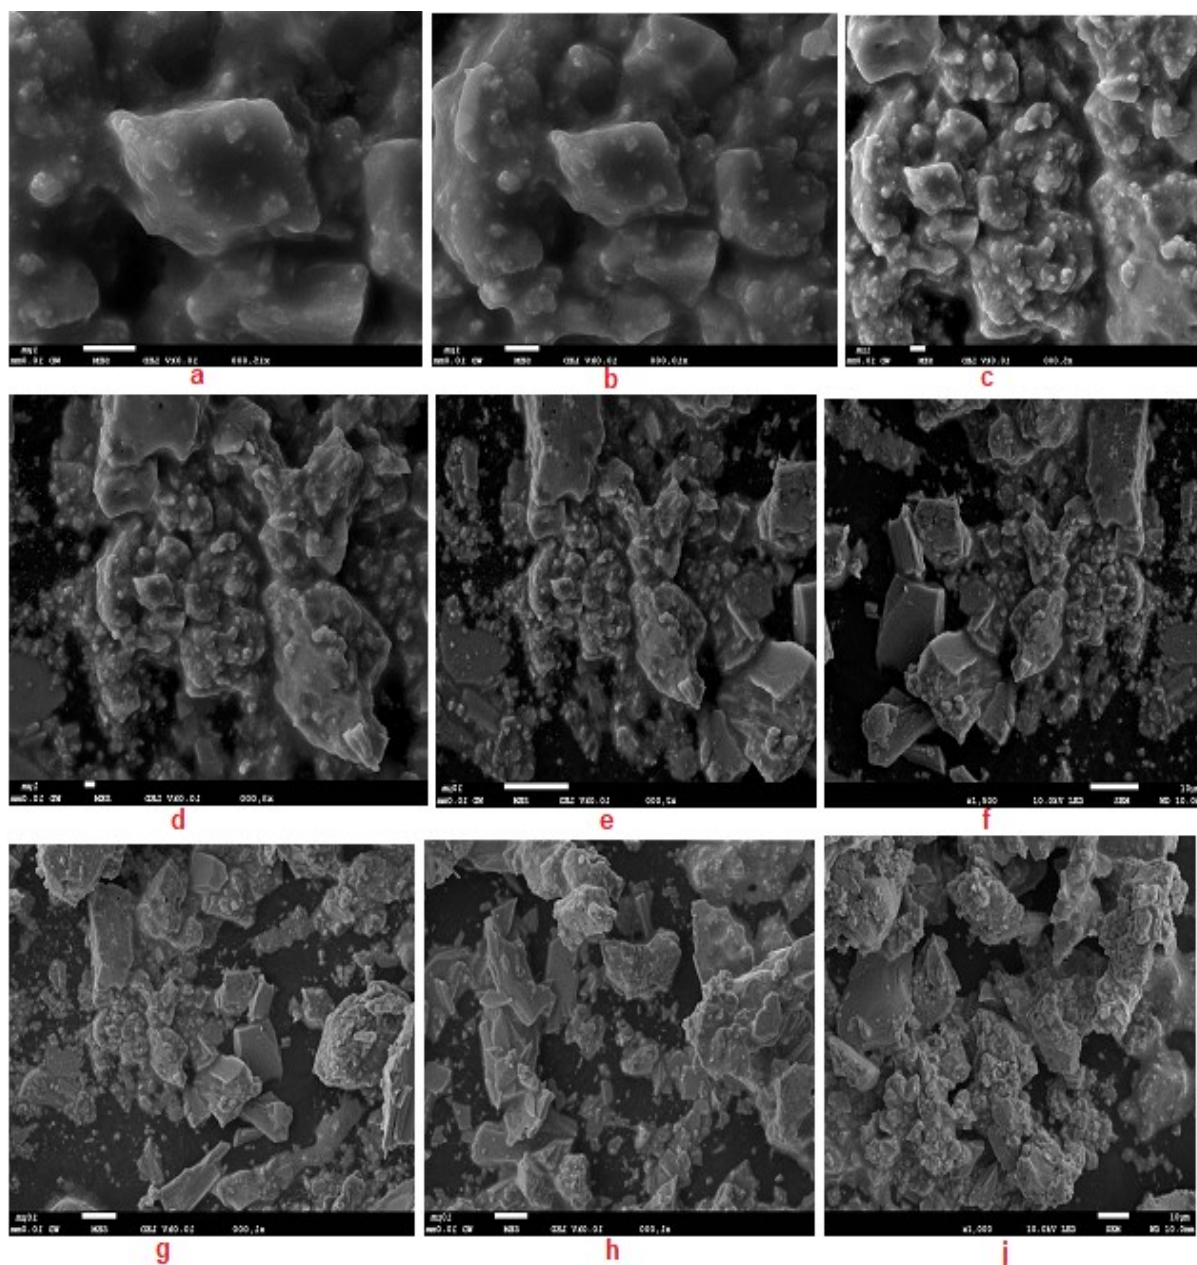

Fig.S11a-j SEM micrographs for complex 1.

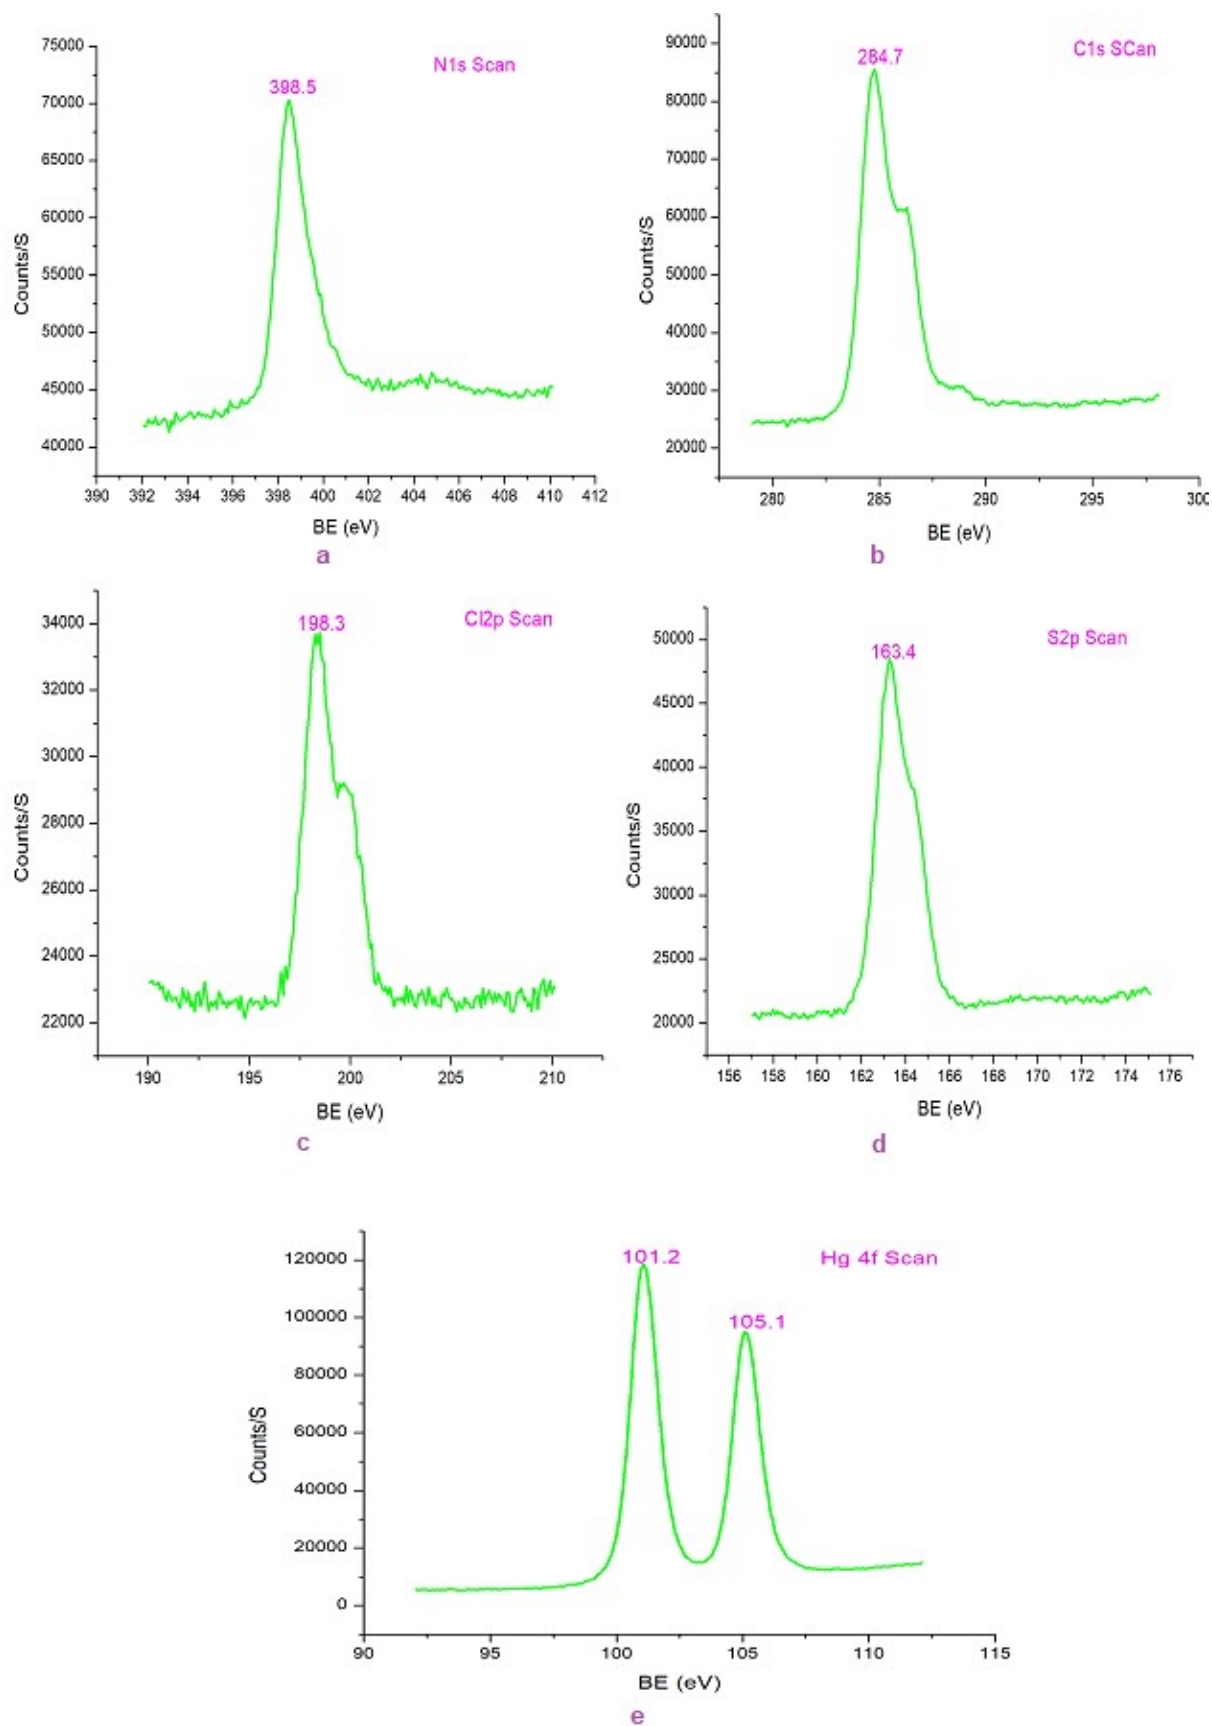

Fig.S12a-e XPS graphical representation for complex 1.

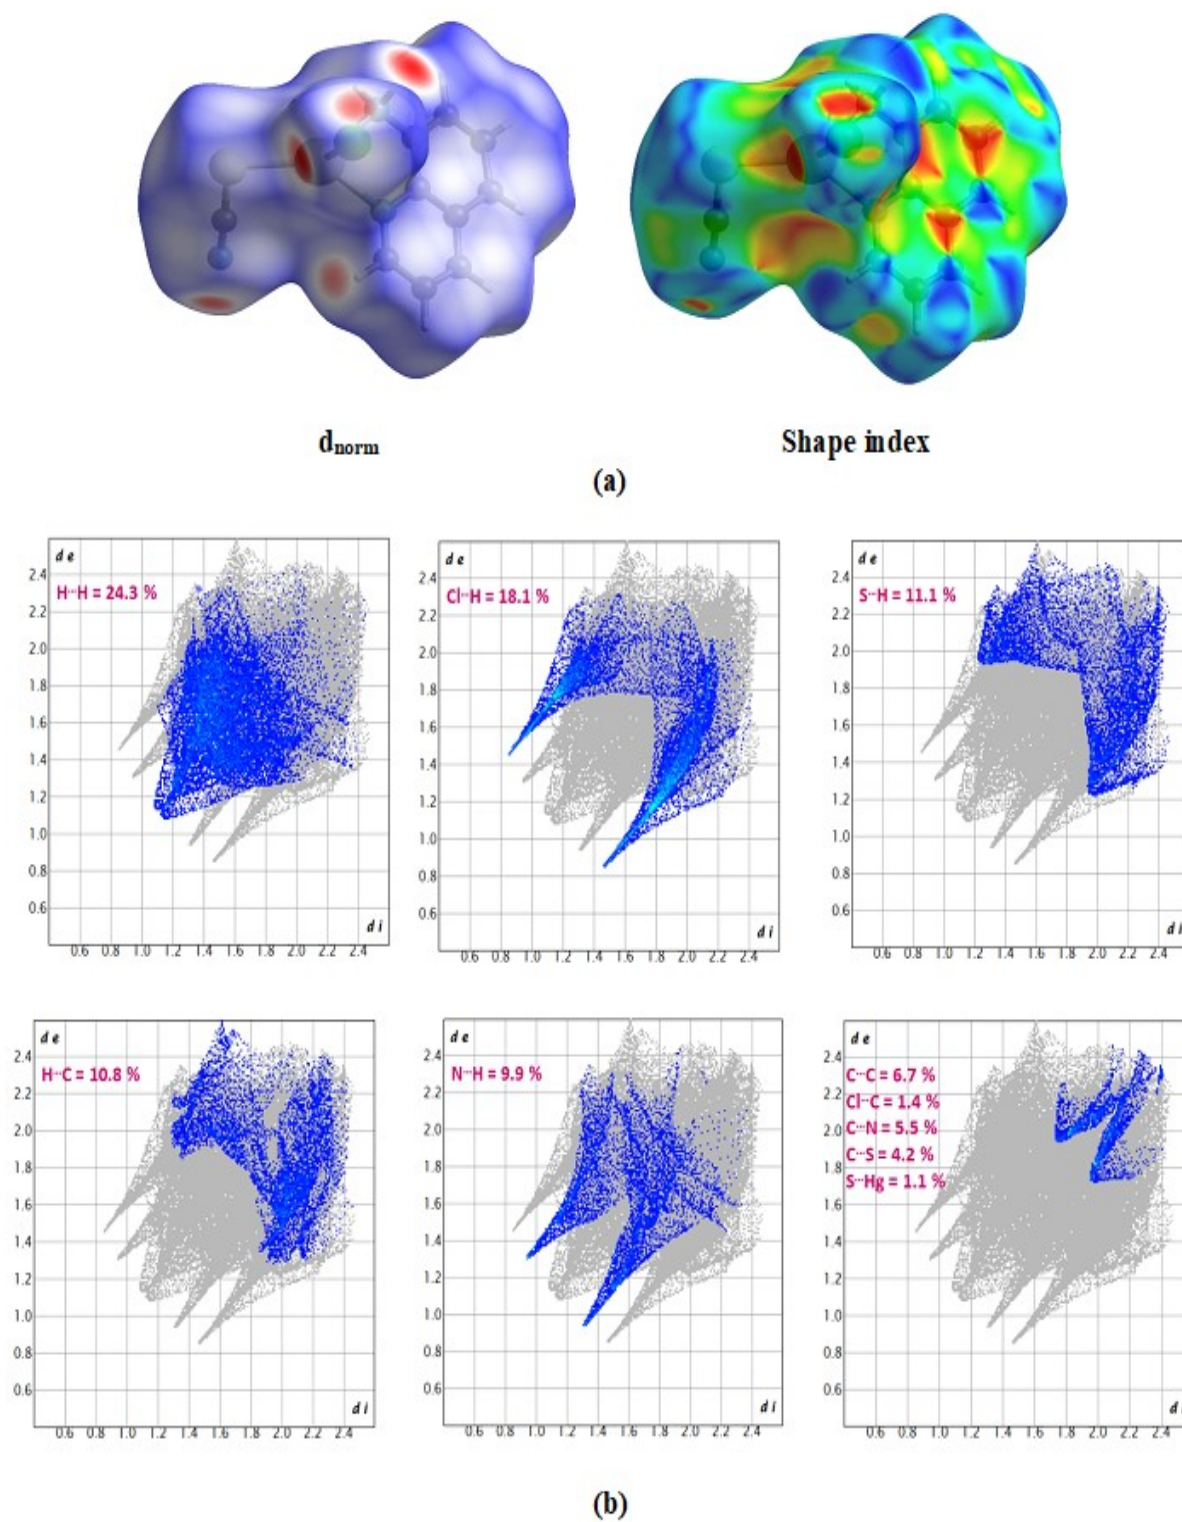

Fig.S13 Hirshfeld surface and 2D Fingerprints for complex 1 (a, b).



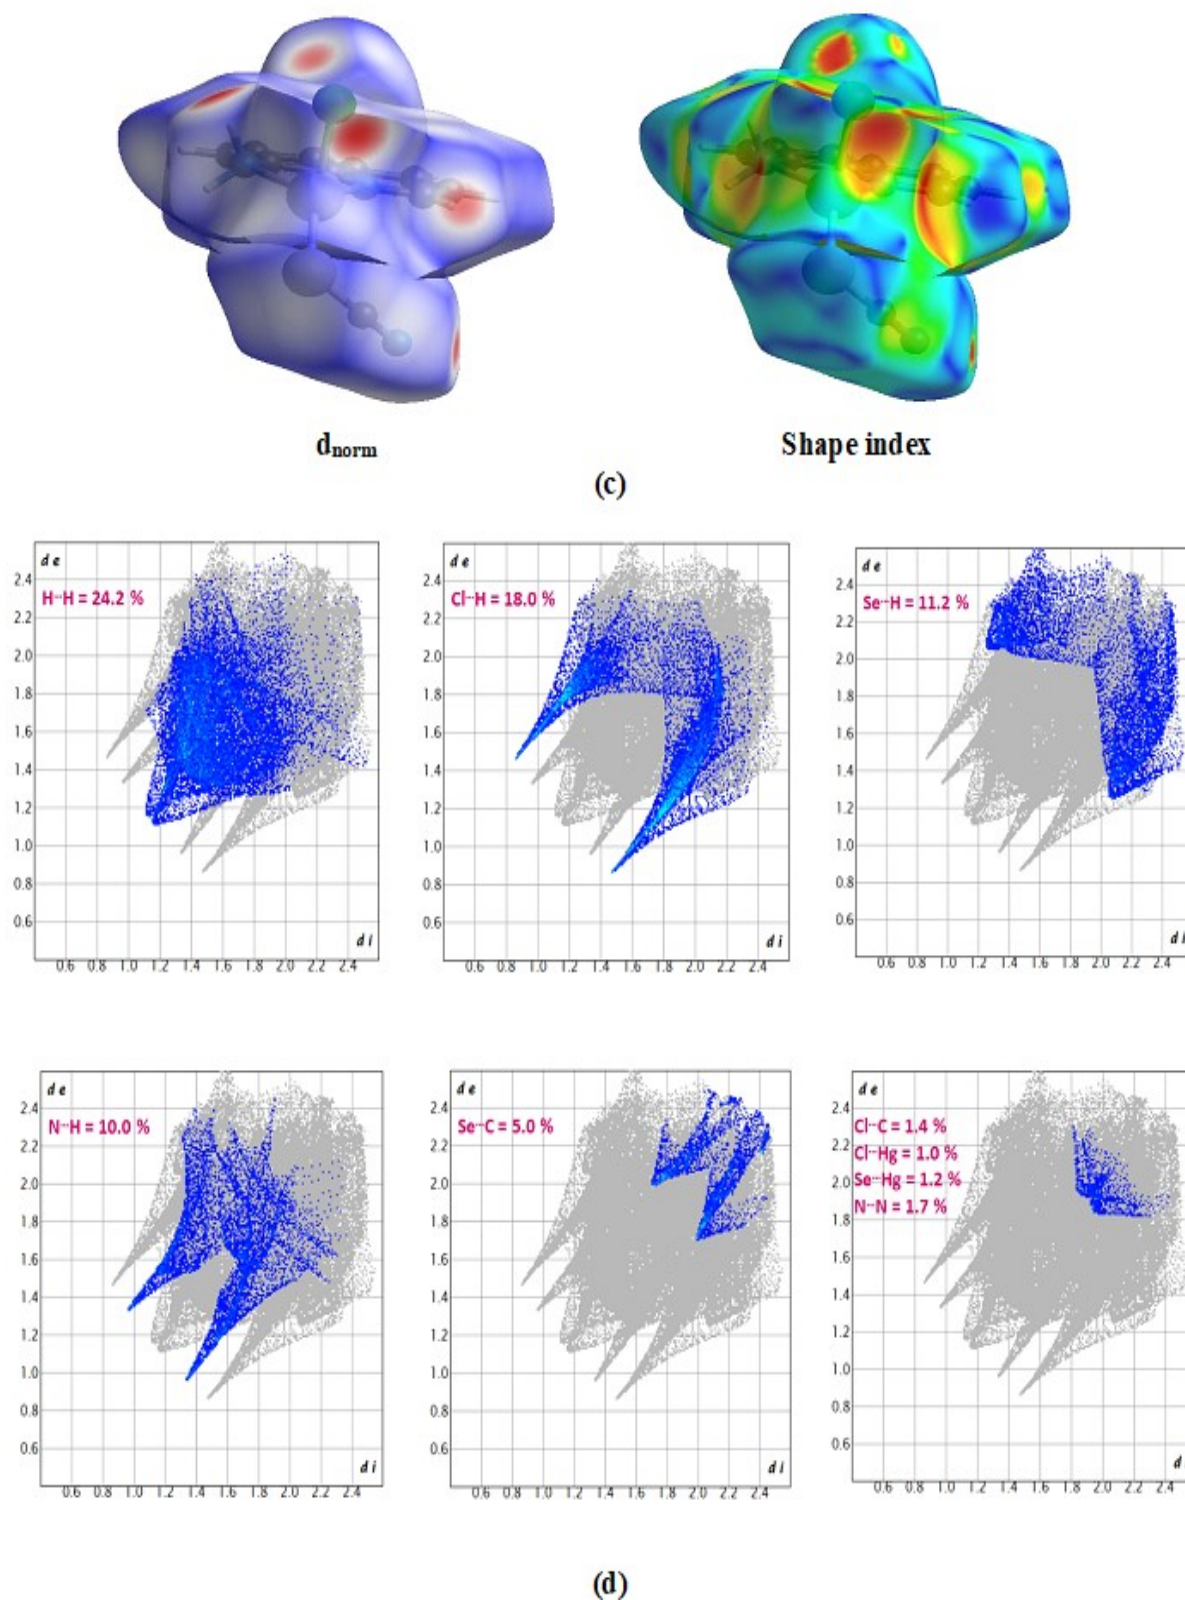

Fig. S14 Hirshfeld surface and 2D Fingerprints for complex 2 (c, d).

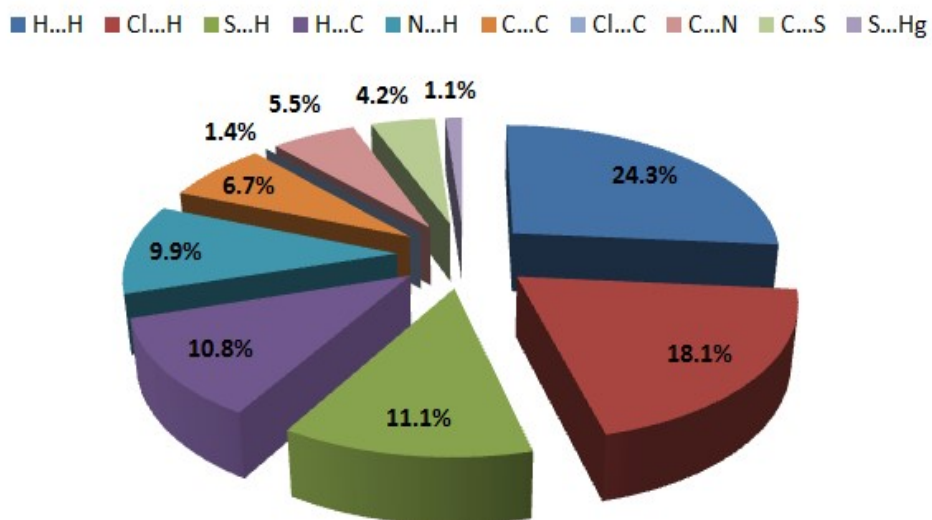

Fig.S14a Histogram showing the different percentage of HS contacts.

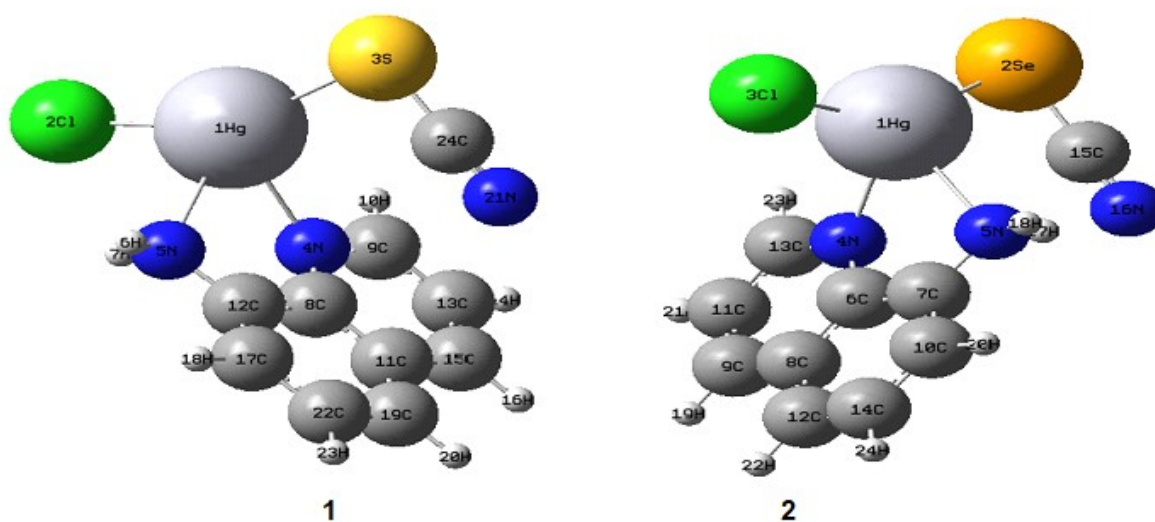

Fig.S15 DFT optimized the structure of the Hg(II) complexes.

## References

S1 S. Hazra, D. J. Majumdar, A. Frontera, S. Roy, B. Gassoumi, H. Ghalla, and S. Dalai, *Crystal Growth & Des.*, 2024, **24**, 7246–7261.

S2 S. Hazra, D. J. Majumdar, J. E. Philip, B. Gassoumi, H. Ghalla, S. Roy, and S. Dalai, *J. Inorg. Organomet. Polym.*, (2024). <https://doi.org/10.1007/s10904-024-03251-9>.

S3 L. M. Yang, Y. Liu, L. M. Man, M J. R. Zhou, X. P. Liu, and C. L. Ni, *Vib. Spectrosc.*, 2017, **93**, 23-28.

S4 B. Abdelaziz, Z. Mazouz, B. Gassoumi, N. El Islam Boukourt, S. Patané, and S. Ayachi, *J. Mol. Liq.*, 2024, **395 (1)**, 123934.

S5 R. Kumar, A. Thakur, D. S. Chandra, A. K. Dhiman, P. K. Verma, and U. Sharma, *Coord. Chem. Rev.*, 2024, **499**, 215453.
